# Supplementary material for: Can cytosine, thymine and uracil be formed in interstellar regions? A theoretical study
Source: Royal Society of Chemistry journal article supplement (doi:10.1039/c1ob06352a), 2011-10-05
Supplement: c1ob06352a.pdf [file c1ob06352a.pdf]

## **Electronic Supplementary Information**

**Can cytosine, uracil and thymine be formed in interstellar regions? A  
theoretical study.**

**Tianfang Wang and John H. Bowie**

Department of Chemistry, The University of Adelaide, South Australia 5005,  
Australia

**Fig.S1** Gas-phase reaction between HNCO and H<sub>2</sub>O. CCSD(T)/6-311++G(d,p)//B3LYP/6-311++G(d,p) level of theory. Relative energies in kJ mol<sup>-1</sup>.

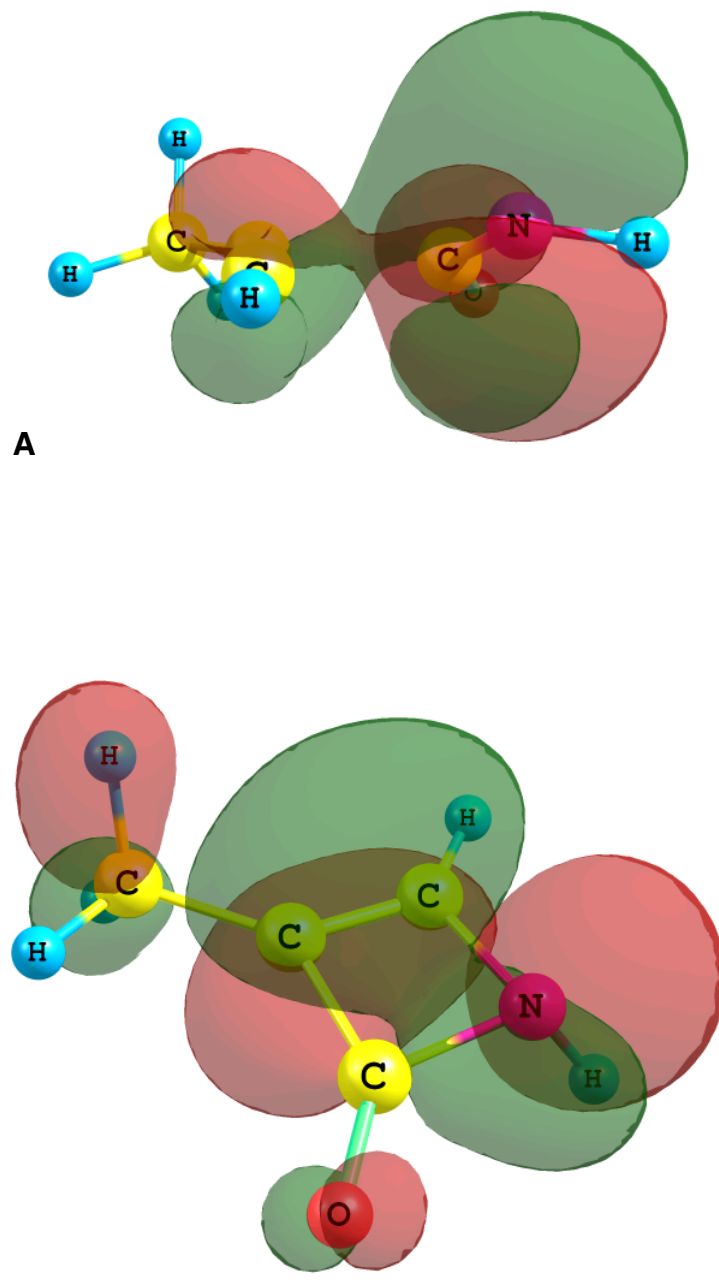

**Fig.S2** A. The HOMO of the transition state for the first step in Scheme 3; B. The HOMO of the product for the first step in **Scheme 3**. Calculated at CCSD(T)/6-311++G(d,p)//B3LYP/6-311++G(d,p) level of theory.

### Tunnelling theoretical methods

The tunnelling corrected rate constants evaluated by WKB (Wentzel-Kramers-Brillouin) method for the first steps in Figures 1a and 1b were computed within a reaction-path Hamiltonian model by multiplying the classical rate at which the reactant hits the reaction barrier by the quantum mechanical transmission probability.<sup>48,49</sup> The B3LYP/aug-cc-pVTZ method was employed to map out the intrinsic reaction coordinate (IRC) and to obtain harmonic vibrational frequencies along the pathways. The final potential energy function  $V$  along the carbenoid insertion IRC was also constructed at this level of theory with ZPVEs correction. A polynomial expression fit of these points was used to represent  $V$  in terms of the arc length  $s$  (atomic units) in mass-weighted coordinates along the IRC, as well as to ensure that  $V(s)$  extended smoothly all the way to the reactant minimum. A plot of  $V(s)$  for the first step (H transfers) in Figure 1a and Figure 1b in  $\text{kJ mol}^{-1}$  is shown in Supplementary Figures S3 and S5, respectively. The IRC in Figure S3 through the hyperspace of the 33 vibrational degrees of freedom was adopted as the tunnelling route, while for the IRC in Figure S5, the hyperspace contains 30 vibrations. Tunnelling probabilities  $[P(\varepsilon)]$  were evaluated by computing one-dimensional barrier penetration integrals  $[\theta(s)]$  numerically along the IRC and invoking the standard WKB formula:

$$\theta(\varepsilon) = \frac{1}{\hbar} \int_{s_1}^{s_2} \sqrt{2\mu(V(s) - \varepsilon)} ds \quad (1)$$

$$P(\varepsilon) = \frac{1}{1 + e^{2\theta(\varepsilon)}} \quad (2)$$

where  $\varepsilon$  is the collision energy,  $\mu$  is the corresponding reduced mass,  $s$  is the reaction coordinate,  $s_1$  and  $s_2$  are the turning points where the  $V(s) = \varepsilon$ , then the tunnelling rate constant at a energy  $\varepsilon$  is

$$k_{WKB} = \frac{\omega_0}{2\pi} P(\varepsilon) \quad (3)$$

where  $\omega_0$  is the vibrational “reaction” mode of reactants that leads toward **TS 1/2 (TS 5/6)**.

The tunnelling contributions to the rate constant were also estimated using Eckart method, in which the cross-section of the potential energy surface is fitted with the Eckart potential,<sup>50,51</sup>

$$V(s) = \frac{A \exp(\frac{s-s_0}{l})}{1 + \exp(\frac{s-s_0}{l})} + \frac{B \exp(\frac{s-s_0}{l})}{[1 + \exp(\frac{s-s_0}{l})]^2} \quad (4)$$

The fitting parameters are

$$A = V_f - V_r$$

$$B = (\sqrt{V_f} + \sqrt{V_r})^2$$

$$l = \frac{2\pi}{\omega^*} \sqrt{\frac{2}{\mu}} \left( \frac{1}{\sqrt{V_f}} + \frac{1}{\sqrt{V_r}} \right)^{-1}$$

while the transmission probability as a function of energy is

$$P(\varepsilon) = \frac{\cosh(\alpha + \beta) - \cosh(\alpha - \beta)}{\cosh(\alpha + \beta) + \cosh \delta} \quad (5)$$

The parameters are

$$\alpha = \frac{4\pi}{\square\Phi^*} \left( \frac{1}{\sqrt{V_f}} + \frac{1}{\sqrt{V_r}} \right)^{-1} \sqrt{\varepsilon}$$

$$\beta = \frac{4\pi}{\square\Phi^*} \left( \frac{1}{\sqrt{V_f}} + \frac{1}{\sqrt{V_r}} \right)^{-1} \sqrt{\varepsilon - V_f + V_r}$$

$$\delta = 4\pi \sqrt{\frac{V_f V_r}{(\square\Phi^*)^2} - \frac{1}{16}}$$

Where  $\varepsilon$  is the collision energy,  $V_f$  and  $V_r$  are the energy barriers with ZPEs (excluding the vibration corresponding to reaction mode) in the forward and reverse direction,  $\omega^*$  is the absolute value of imaginary frequency of the transition state. The rate constant can be calculated by the following equation,

$$k_{Eckart} = \frac{\omega_0}{2\pi} P(\varepsilon) = \frac{\omega_0}{2\pi} \frac{\cosh(\alpha + \beta) - \cosh(\alpha - \beta)}{\cosh(\alpha + \beta) + \cosh \delta} \quad (6)$$

Eventually, the temperature dependant rate constant expression for WKB and Eckart methods is as follows,

$$k(T) = \frac{\sum_{n=0}^{\infty} k(n\square\phi_0) e^{-\frac{n\square\phi_0}{kT}}}{\sum_{n=0}^{\infty} e^{-\frac{n\square\phi_0}{kT}}} \quad (7), \text{ in which } T \text{ is the temperature in K.}$$

| Process shown in Figure S3                                              | Process shown in Figure S5                                              |
|-------------------------------------------------------------------------|-------------------------------------------------------------------------|
| Collision frequency ( $\omega_0$ ) = 32 cm <sup>-1</sup>                | Collision frequency ( $\omega_0$ ) = 69 cm <sup>-1</sup>                |
| Imaginary frequency ( $\omega^*$ ) = 840i cm <sup>-1</sup>              | Imaginary frequency ( $\omega^*$ ) = 1138i cm <sup>-1</sup>             |
| Turning points ( $s_1, s_2$ ) = (-20.80, 18.53) amu <sup>1/2</sup> bohr | Turning points ( $s_1, s_2$ ) = (-18.42, 17.27) amu <sup>1/2</sup> bohr |
| $V_f$ = 10745 cm <sup>-1</sup>                                          | $V_f$ = 10593 cm <sup>-1</sup>                                          |
| $V_r$ = 20745 cm <sup>-1</sup>                                          | $V_r$ = 22734 cm <sup>-1</sup>                                          |

### Comparison of the results of two methods

Some key parameters for carrying out the calculations are collected in the table above. It can be noticed that the widths of both barriers are relatively large, and collision energies are small compared to the overall barrier heights, which would result in low tunnelling probabilities. The tunnelling corrected rate constants at various temperatures determined by WKB and Eckart methods at B3LYP/aug-cc-pVTZ are shown in Figure S4 and S6. The discrepancies between WKB and Eckart results are significant in the low temperature region, caused by the different shape of potential energy curves. The rate constants for reactions above 200K (see Figure S4) and above 250K (see Figure S6) show satisfactory agreement. The WKB estimation of transmission probability at low temperatures gives closer to the exact solution of the Schrödinger equation (5), yielding reasonable results at the low-temperature limit. At room temperature both of these two methods performs well, and they quantitatively coincide as temperature increases.

### Conclusion

According to the WKB method described above, it can be seen that the penetration integral  $\theta(\varepsilon)$  and hence the tunnelling probability  $P(\varepsilon)$  are principally dependant on three factors: the width of the barrier, the square root of the difference between the overall barrier height and the collision energy, and the square root of the effective mass. Moreover, barrier width trumps barrier height because the penetration integral ( $\theta$ ) scales linearly with the former but only as the square root of the latter. The IRC calculations show that the barriers are wide especially at the bottom (see Figs S3 and S5) where the tunnelling may occur at low temperature, as there are extensive geometry variations in these processes to reach the minimum points, which

make the tunnelling probabilities small. For example, the calculations show that both processes have extremely low tunnelling corrected rate constants at low temperature,  $\sim 10^{-40}$   $\text{s}^{-1}$  ( $k_{WKB}$ ) at 125 K for Fig.S4, and  $\sim 10^{-32}$   $\text{s}^{-1}$  ( $k_{WKB}$ ) at 150K for Fig.S6, which yield extraordinarily long half-life ( $t_{1/2} = (\ln 2)/k$ ) for the reactants (c.f. Fig.S1 and S3). It means that the tunnelling effect is negligible for both reactions.

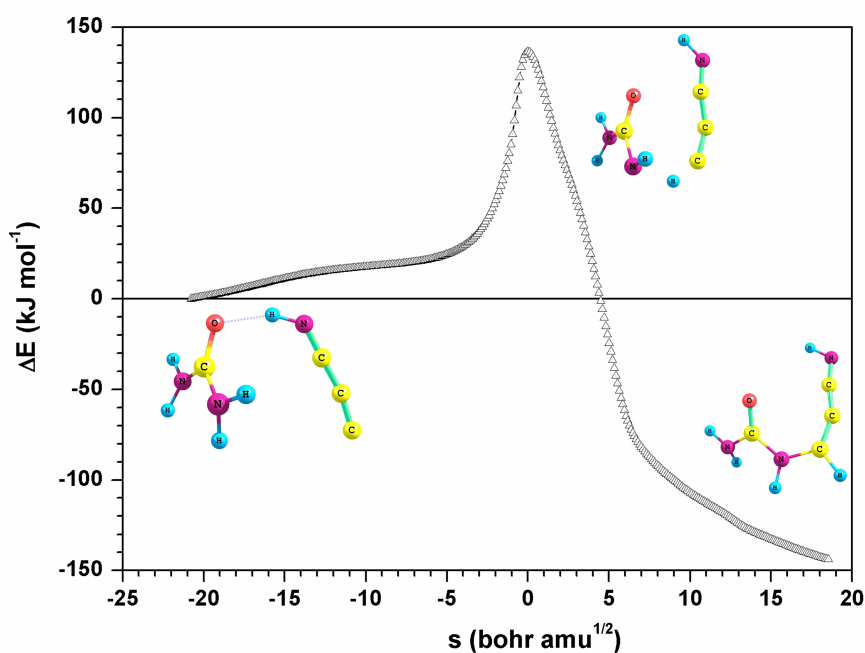

**Fig.S3** Potential energy curve along the intrinsic reaction coordinate (IRC) for the first step in Fig.1a. The geometric structures, zero-point vibrational corrections and energetics along the path were generated at the B3LYP/aug-cc-pVTZ level of theory. The abscissa is the arc length along the path in mass-weighted Cartesian coordinates.

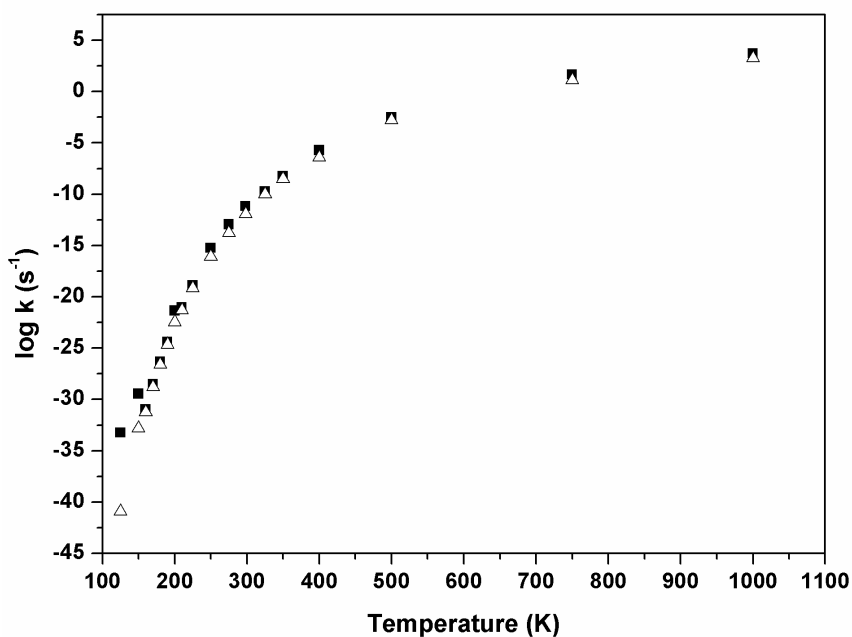

**Fig.S4** Temperature dependence of Eckart (solid squares) and WKB (open triangles) tunnelling corrected rate constants for the reaction shown in Fig.S3.

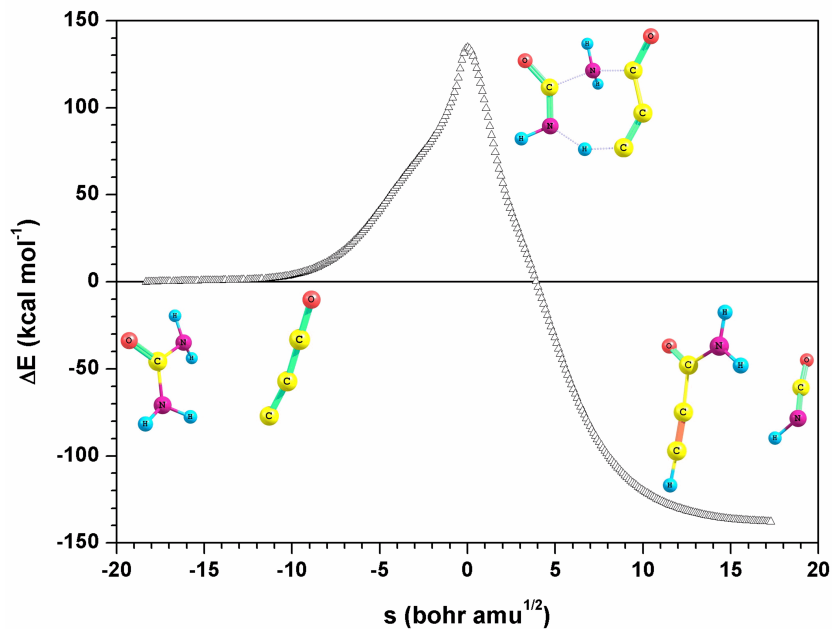

**Fig.S5** Potential energy curve along the intrinsic reaction coordinate (IRC) for the first step in Fig.1b. The geometric structures, zero-point vibrational corrections and energetics along the path were generated at the B3LYP/aug-cc-pVTZ level of theory. The abscissa is the arc length along the path in mass-weighted Cartesian coordinates.



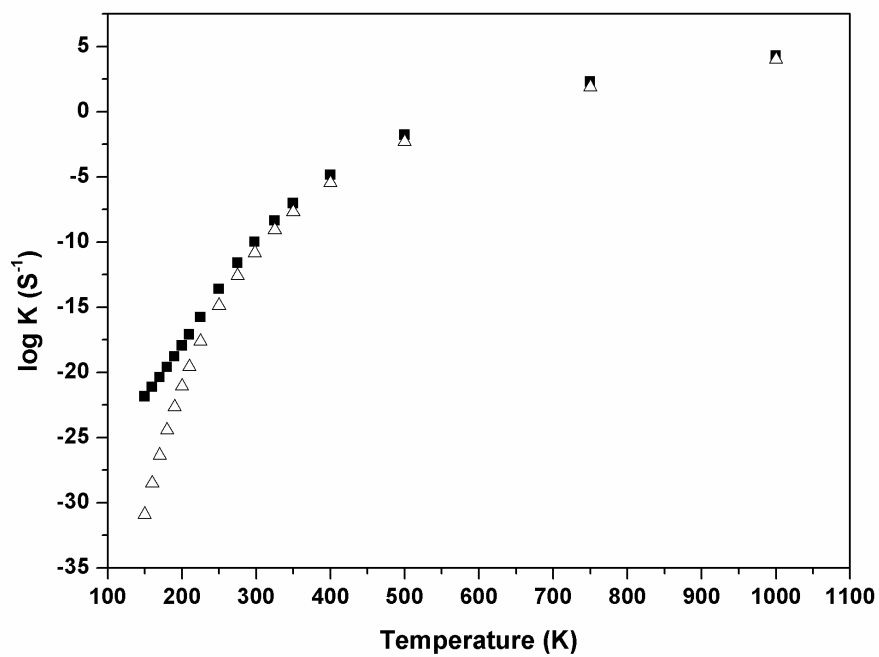

**Fig.S6** Temperature dependence of Eckart (solid squares) and WKB (open triangles) tunnelling corrected rate constants for the reaction shown in Fig.S5.

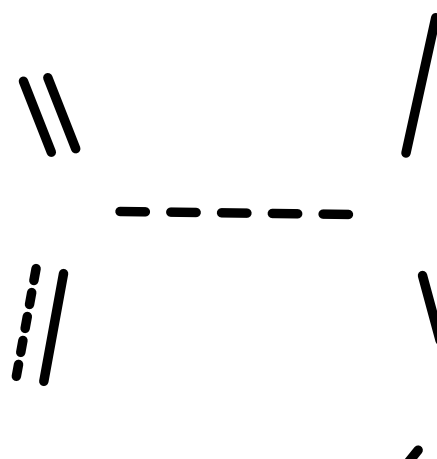

**Fig.S7a** Reaction coordinate diagram for the reaction between the mono hydrated propional enolate anion and two molecules of isocyanic acid to produce thymine. *Planar (eclipsed)* elimination. CCSD(T)/6-311++G(d,p)//B3LYP/6-311++G(d,p) level of theory,  $\Delta G$  energies in  $\text{kJ mol}^{-1}$ . For full details of energies and geometries of minima and transition states see **Table S7a**.

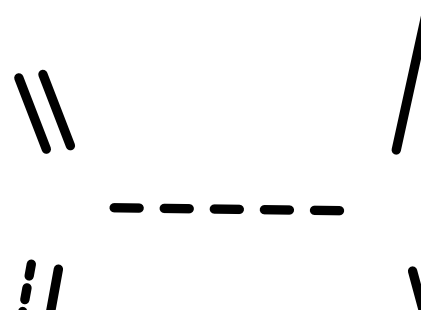

**Fig.S8** Reaction coordinate diagram for the reaction between the mono hydrated propional enolate anion and two molecules of isocyanic acid to produce thymine. Anti elimination. CCSD(T)/6-311++G(d,p)//B3LYP/6-311++G(d,p) level of theory,  $\Delta G$  energies in  $\text{kJ mol}^{-1}$ . For full details of energies and geometries of minima and transition states see **Table S8**.

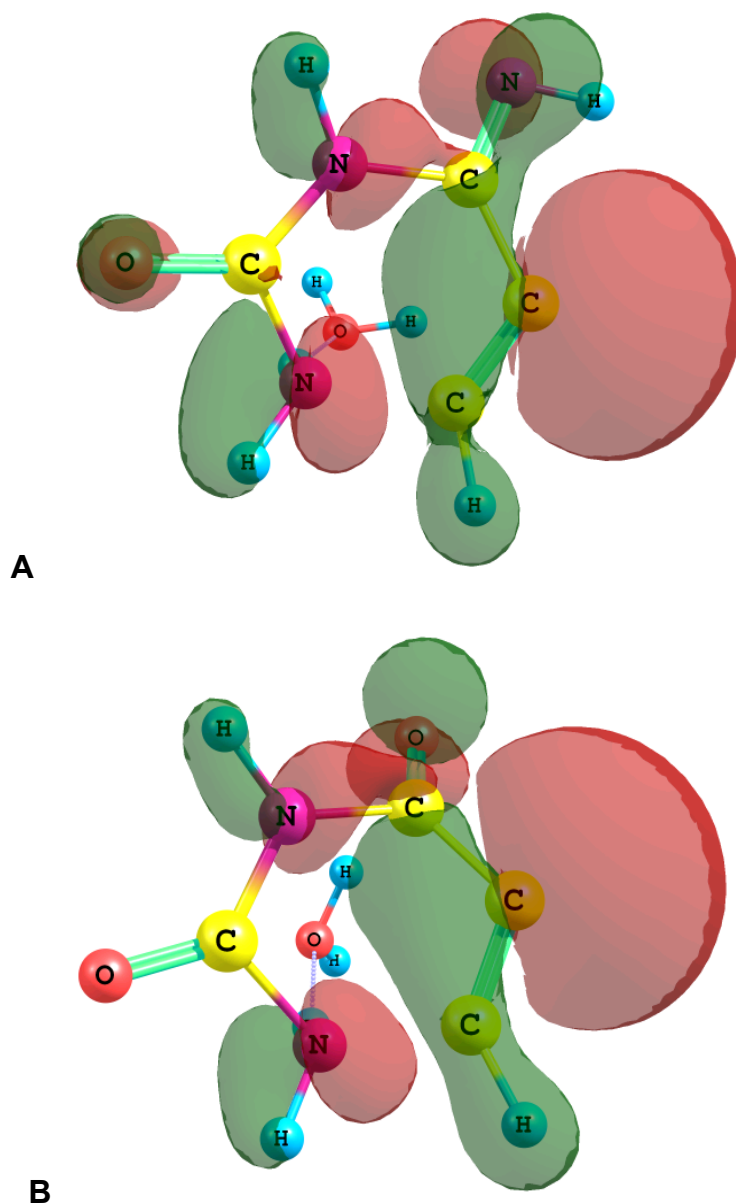

**Fig.S9** A. The HOMO of the intermediate **19** in **Table S3a**; B. The HOMO of the intermediate **24** in **Table S3b**. (A red orbital indicates  $\delta^-$  charge; a green orbital indicates  $\delta^+$  charge). Calculated at CCSD(T)/6-311++G(d,p)//B3LYP/6-311++G(d,p) level of theory.

**Table S1-7** Energies (0 K), Gibbs free energies (298 K) and selected geometries of reactants and products for reactions in Figs 1 to 7.

Level of theory used CCSD(T)/6-311++G(d,p)//B3LYP/6-311++G(d,p).

|                                             |                                                                                                                                                                                                                                                                                                                                                                                                                                                                                                                                                                                                                                                                                                                                                                                                      |           |           |          |           |   |           |          |           |   |           |           |           |   |           |           |           |   |           |           |           |   |          |           |           |   |          |           |          |
|---------------------------------------------|------------------------------------------------------------------------------------------------------------------------------------------------------------------------------------------------------------------------------------------------------------------------------------------------------------------------------------------------------------------------------------------------------------------------------------------------------------------------------------------------------------------------------------------------------------------------------------------------------------------------------------------------------------------------------------------------------------------------------------------------------------------------------------------------------|-----------|-----------|----------|-----------|---|-----------|----------|-----------|---|-----------|-----------|-----------|---|-----------|-----------|-----------|---|-----------|-----------|-----------|---|----------|-----------|-----------|---|----------|-----------|----------|
| <p style="text-align: center;"><b>A</b></p> | <p>Energy: -224.73653 Hartree, Gibbs free energy: -224.76284 Hartree<br/>                     Dipole: 4.1709. Symmetry: <math>C_1</math>, State: <math>^1A_1</math>.<br/>                     Cartesian Coordinates:</p> <table border="1"> <tbody> <tr><td>C</td><td>-0.000002</td><td>0.143421</td><td>-0.000007</td></tr> <tr><td>O</td><td>-0.000086</td><td>1.360131</td><td>0.000003</td></tr> <tr><td>N</td><td>-1.161439</td><td>-0.609856</td><td>0.068289</td></tr> <tr><td>H</td><td>-2.002491</td><td>-0.072040</td><td>-0.076207</td></tr> <tr><td>H</td><td>-1.166817</td><td>-1.530321</td><td>-0.344981</td></tr> <tr><td>N</td><td>1.161518</td><td>-0.609747</td><td>-0.068313</td></tr> <tr><td>H</td><td>2.002482</td><td>-0.071825</td><td>0.076305</td></tr> </tbody> </table> | C         | -0.000002 | 0.143421 | -0.000007 | O | -0.000086 | 1.360131 | 0.000003  | N | -1.161439 | -0.609856 | 0.068289  | H | -2.002491 | -0.072040 | -0.076207 | H | -1.166817 | -1.530321 | -0.344981 | N | 1.161518 | -0.609747 | -0.068313 | H | 2.002482 | -0.071825 | 0.076305 |
| C                                           | -0.000002                                                                                                                                                                                                                                                                                                                                                                                                                                                                                                                                                                                                                                                                                                                                                                                            | 0.143421  | -0.000007 |          |           |   |           |          |           |   |           |           |           |   |           |           |           |   |           |           |           |   |          |           |           |   |          |           |          |
| O                                           | -0.000086                                                                                                                                                                                                                                                                                                                                                                                                                                                                                                                                                                                                                                                                                                                                                                                            | 1.360131  | 0.000003  |          |           |   |           |          |           |   |           |           |           |   |           |           |           |   |           |           |           |   |          |           |           |   |          |           |          |
| N                                           | -1.161439                                                                                                                                                                                                                                                                                                                                                                                                                                                                                                                                                                                                                                                                                                                                                                                            | -0.609856 | 0.068289  |          |           |   |           |          |           |   |           |           |           |   |           |           |           |   |           |           |           |   |          |           |           |   |          |           |          |
| H                                           | -2.002491                                                                                                                                                                                                                                                                                                                                                                                                                                                                                                                                                                                                                                                                                                                                                                                            | -0.072040 | -0.076207 |          |           |   |           |          |           |   |           |           |           |   |           |           |           |   |           |           |           |   |          |           |           |   |          |           |          |
| H                                           | -1.166817                                                                                                                                                                                                                                                                                                                                                                                                                                                                                                                                                                                                                                                                                                                                                                                            | -1.530321 | -0.344981 |          |           |   |           |          |           |   |           |           |           |   |           |           |           |   |           |           |           |   |          |           |           |   |          |           |          |
| N                                           | 1.161518                                                                                                                                                                                                                                                                                                                                                                                                                                                                                                                                                                                                                                                                                                                                                                                             | -0.609747 | -0.068313 |          |           |   |           |          |           |   |           |           |           |   |           |           |           |   |           |           |           |   |          |           |           |   |          |           |          |
| H                                           | 2.002482                                                                                                                                                                                                                                                                                                                                                                                                                                                                                                                                                                                                                                                                                                                                                                                             | -0.071825 | 0.076305  |          |           |   |           |          |           |   |           |           |           |   |           |           |           |   |           |           |           |   |          |           |           |   |          |           |          |
| <p style="text-align: center;"><b>B</b></p> | <p>Energy: -169.07439 Hartree, Gibbs free energy: -169.09924 Hartree<br/>                     Dipole: 5.2427. Symmetry: <math>C_1</math>, State: <math>^1A_1</math>.<br/>                     Cartesian Coordinates:</p> <table border="1"> <tbody> <tr><td>C</td><td>0.497806</td><td>0.013092</td><td>-0.000009</td></tr> <tr><td>C</td><td>-0.804727</td><td>0.009716</td><td>-0.000822</td></tr> <tr><td>C</td><td>-2.072592</td><td>0.006946</td><td>0.000554</td></tr> <tr><td>N</td><td>1.681229</td><td>-0.093598</td><td>0.000192</td></tr> <tr><td>H</td><td>2.508474</td><td>0.476666</td><td>0.000325</td></tr> </tbody> </table>                                                                                                                                                        | C         | 0.497806  | 0.013092 | -0.000009 | C | -0.804727 | 0.009716 | -0.000822 | C | -2.072592 | 0.006946  | 0.000554  | N | 1.681229  | -0.093598 | 0.000192  | H | 2.508474  | 0.476666  | 0.000325  |   |          |           |           |   |          |           |          |
| C                                           | 0.497806                                                                                                                                                                                                                                                                                                                                                                                                                                                                                                                                                                                                                                                                                                                                                                                             | 0.013092  | -0.000009 |          |           |   |           |          |           |   |           |           |           |   |           |           |           |   |           |           |           |   |          |           |           |   |          |           |          |
| C                                           | -0.804727                                                                                                                                                                                                                                                                                                                                                                                                                                                                                                                                                                                                                                                                                                                                                                                            | 0.009716  | -0.000822 |          |           |   |           |          |           |   |           |           |           |   |           |           |           |   |           |           |           |   |          |           |           |   |          |           |          |
| C                                           | -2.072592                                                                                                                                                                                                                                                                                                                                                                                                                                                                                                                                                                                                                                                                                                                                                                                            | 0.006946  | 0.000554  |          |           |   |           |          |           |   |           |           |           |   |           |           |           |   |           |           |           |   |          |           |           |   |          |           |          |
| N                                           | 1.681229                                                                                                                                                                                                                                                                                                                                                                                                                                                                                                                                                                                                                                                                                                                                                                                             | -0.093598 | 0.000192  |          |           |   |           |          |           |   |           |           |           |   |           |           |           |   |           |           |           |   |          |           |           |   |          |           |          |
| H                                           | 2.508474                                                                                                                                                                                                                                                                                                                                                                                                                                                                                                                                                                                                                                                                                                                                                                                             | 0.476666  | 0.000325  |          |           |   |           |          |           |   |           |           |           |   |           |           |           |   |           |           |           |   |          |           |           |   |          |           |          |
| <p style="text-align: center;"><b>C</b></p> | <p>Energy: -188.96326 Hartree, Gibbs free energy: -188.98687 Hartree<br/>                     Dipole: 1.6740. Symmetry: <math>C_{\infty h}</math>, State: <math>^1\Sigma_g^-</math>.<br/>                     Cartesian Coordinates:</p> <table border="1"> <tbody> <tr><td>C</td><td>0.000000</td><td>0.000000</td><td>-0.758150</td></tr> <tr><td>C</td><td>0.000000</td><td>0.000000</td><td>0.537142</td></tr> <tr><td>O</td><td>0.000000</td><td>0.000000</td><td>1.686818</td></tr> <tr><td>C</td><td>0.000000</td><td>0.000000</td><td>-2.028083</td></tr> </tbody> </table>                                                                                                                                                                                                                  | C         | 0.000000  | 0.000000 | -0.758150 | C | 0.000000  | 0.000000 | 0.537142  | O | 0.000000  | 0.000000  | 1.686818  | C | 0.000000  | 0.000000  | -2.028083 |   |           |           |           |   |          |           |           |   |          |           |          |
| C                                           | 0.000000                                                                                                                                                                                                                                                                                                                                                                                                                                                                                                                                                                                                                                                                                                                                                                                             | 0.000000  | -0.758150 |          |           |   |           |          |           |   |           |           |           |   |           |           |           |   |           |           |           |   |          |           |           |   |          |           |          |
| C                                           | 0.000000                                                                                                                                                                                                                                                                                                                                                                                                                                                                                                                                                                                                                                                                                                                                                                                             | 0.000000  | 0.537142  |          |           |   |           |          |           |   |           |           |           |   |           |           |           |   |           |           |           |   |          |           |           |   |          |           |          |
| O                                           | 0.000000                                                                                                                                                                                                                                                                                                                                                                                                                                                                                                                                                                                                                                                                                                                                                                                             | 0.000000  | 1.686818  |          |           |   |           |          |           |   |           |           |           |   |           |           |           |   |           |           |           |   |          |           |           |   |          |           |          |
| C                                           | 0.000000                                                                                                                                                                                                                                                                                                                                                                                                                                                                                                                                                                                                                                                                                                                                                                                             | 0.000000  | -2.028083 |          |           |   |           |          |           |   |           |           |           |   |           |           |           |   |           |           |           |   |          |           |           |   |          |           |          |
| <p style="text-align: center;"><b>D</b></p> | <p>Energy: -169.15607 Hartree, Gibbs free energy: -169.17933 Hartree<br/>                     Dipole: 4.1974. Symmetry: <math>C_{\infty h}</math>, State: <math>^1\Sigma_g^-</math>.<br/>                     Cartesian Coordinates:</p> <table border="1"> <tbody> <tr><td>C</td><td>0.000000</td><td>0.000000</td><td>-1.834920</td></tr> <tr><td>H</td><td>0.000000</td><td>0.000000</td><td>-2.898788</td></tr> <tr><td>C</td><td>0.000000</td><td>0.000000</td><td>-0.631281</td></tr> <tr><td>C</td><td>0.000000</td><td>0.000000</td><td>0.737609</td></tr> <tr><td>N</td><td>0.000000</td><td>0.000000</td><td>1.895763</td></tr> </tbody> </table>                                                                                                                                          | C         | 0.000000  | 0.000000 | -1.834920 | H | 0.000000  | 0.000000 | -2.898788 | C | 0.000000  | 0.000000  | -0.631281 | C | 0.000000  | 0.000000  | 0.737609  | N | 0.000000  | 0.000000  | 1.895763  |   |          |           |           |   |          |           |          |
| C                                           | 0.000000                                                                                                                                                                                                                                                                                                                                                                                                                                                                                                                                                                                                                                                                                                                                                                                             | 0.000000  | -1.834920 |          |           |   |           |          |           |   |           |           |           |   |           |           |           |   |           |           |           |   |          |           |           |   |          |           |          |
| H                                           | 0.000000                                                                                                                                                                                                                                                                                                                                                                                                                                                                                                                                                                                                                                                                                                                                                                                             | 0.000000  | -2.898788 |          |           |   |           |          |           |   |           |           |           |   |           |           |           |   |           |           |           |   |          |           |           |   |          |           |          |
| C                                           | 0.000000                                                                                                                                                                                                                                                                                                                                                                                                                                                                                                                                                                                                                                                                                                                                                                                             | 0.000000  | -0.631281 |          |           |   |           |          |           |   |           |           |           |   |           |           |           |   |           |           |           |   |          |           |           |   |          |           |          |
| C                                           | 0.000000                                                                                                                                                                                                                                                                                                                                                                                                                                                                                                                                                                                                                                                                                                                                                                                             | 0.000000  | 0.737609  |          |           |   |           |          |           |   |           |           |           |   |           |           |           |   |           |           |           |   |          |           |           |   |          |           |          |
| N                                           | 0.000000                                                                                                                                                                                                                                                                                                                                                                                                                                                                                                                                                                                                                                                                                                                                                                                             | 0.000000  | 1.895763  |          |           |   |           |          |           |   |           |           |           |   |           |           |           |   |           |           |           |   |          |           |           |   |          |           |          |
| <p style="text-align: center;"><b>E</b></p> | <p>Energy: -76.26525 Hartree, Gibbs free energy: -76.28289 Hartree<br/>                     Dipole: 2.2359. Symmetry: <math>C_{2v}</math>, State: <math>^1A_1</math>.</p>                                                                                                                                                                                                                                                                                                                                                                                                                                                                                                                                                                                                                            |           |           |          |           |   |           |          |           |   |           |           |           |   |           |           |           |   |           |           |           |   |          |           |           |   |          |           |          |

Table S1-7 Continued.

|                                              |                                                                                                                                                                                                                                                                                                                                                                                                                                                                                                                                                                                                                                                                                                                                                                                                                                                                                                                                                                                                                                                                                                                                                                                                                                    |           |           |           |           |   |           |           |           |   |           |           |          |   |           |           |           |   |           |          |           |   |           |           |          |   |           |           |           |   |          |           |           |   |           |           |           |   |          |           |           |   |          |           |          |   |          |           |           |
|----------------------------------------------|------------------------------------------------------------------------------------------------------------------------------------------------------------------------------------------------------------------------------------------------------------------------------------------------------------------------------------------------------------------------------------------------------------------------------------------------------------------------------------------------------------------------------------------------------------------------------------------------------------------------------------------------------------------------------------------------------------------------------------------------------------------------------------------------------------------------------------------------------------------------------------------------------------------------------------------------------------------------------------------------------------------------------------------------------------------------------------------------------------------------------------------------------------------------------------------------------------------------------------|-----------|-----------|-----------|-----------|---|-----------|-----------|-----------|---|-----------|-----------|----------|---|-----------|-----------|-----------|---|-----------|----------|-----------|---|-----------|-----------|----------|---|-----------|-----------|-----------|---|----------|-----------|-----------|---|-----------|-----------|-----------|---|----------|-----------|-----------|---|----------|-----------|----------|---|----------|-----------|-----------|
| <p style="text-align: center;"><b>F</b></p>  | <p>Energy: -55.74052 Hartree, Gibbs free energy: -55.75950 Hartree<br/>                 Dipole: 2.0786. Symmetry: <math>C_s</math>, State: <math>^2A''</math>.</p>                                                                                                                                                                                                                                                                                                                                                                                                                                                                                                                                                                                                                                                                                                                                                                                                                                                                                                                                                                                                                                                                 |           |           |           |           |   |           |           |           |   |           |           |          |   |           |           |           |   |           |          |           |   |           |           |          |   |           |           |           |   |          |           |           |   |           |           |           |   |          |           |           |   |          |           |          |   |          |           |           |
| <p style="text-align: center;"><b>G</b></p>  | <p>Energy: -75.58801 Hartree, Gibbs free energy: -75.60494 Hartree<br/>                 Dipole: 1.9146. Symmetry: <math>C_{\infty v}</math>, Charge: 0, State: <math>^2\Sigma</math>.</p>                                                                                                                                                                                                                                                                                                                                                                                                                                                                                                                                                                                                                                                                                                                                                                                                                                                                                                                                                                                                                                          |           |           |           |           |   |           |           |           |   |           |           |          |   |           |           |           |   |           |          |           |   |           |           |          |   |           |           |           |   |          |           |           |   |           |           |           |   |          |           |           |   |          |           |          |   |          |           |           |
| <p style="text-align: center;"><b>H</b></p>  | <p>Energy: -75.63732 Hartree, Gibbs free energy: -75.65357 Hartree<br/>                 Dipole: 1.8000. Symmetry: <math>C_{\infty v}</math>, Charge: -1, State: <math>^1\Sigma</math>.</p>                                                                                                                                                                                                                                                                                                                                                                                                                                                                                                                                                                                                                                                                                                                                                                                                                                                                                                                                                                                                                                         |           |           |           |           |   |           |           |           |   |           |           |          |   |           |           |           |   |           |          |           |   |           |           |          |   |           |           |           |   |          |           |           |   |           |           |           |   |          |           |           |   |          |           |          |   |          |           |           |
| <p style="text-align: center;"><b>I</b></p>  | <p>Energy: -245.47510 Hartree, Gibbs free energy: -245.50390 Hartree<br/>                 Dipole: 2.0558. Symmetry: <math>C_1</math>, State: <math>^1A</math>.<br/>                 Cartesian Coordinates:</p> <table border="1"> <tbody> <tr> <td>C</td> <td>-1.358844</td> <td>0.102476</td> <td>-0.020703</td> </tr> <tr> <td>N</td> <td>-2.394009</td> <td>-0.395614</td> <td>-0.115281</td> </tr> <tr> <td>C</td> <td>-0.030469</td> <td>0.689794</td> <td>0.097466</td> </tr> <tr> <td>H</td> <td>0.015869</td> <td>1.286427</td> <td>1.017563</td> </tr> <tr> <td>H</td> <td>0.176103</td> <td>1.362885</td> <td>-0.737708</td> </tr> <tr> <td>C</td> <td>1.085394</td> <td>-0.361037</td> <td>0.181409</td> </tr> <tr> <td>O</td> <td>2.198173</td> <td>-0.142849</td> <td>-0.208818</td> </tr> <tr> <td>H</td> <td>0.804222</td> <td>-1.324619</td> <td>0.648626</td> </tr> </tbody> </table>                                                                                                                                                                                                                                                                                                                             | C         | -1.358844 | 0.102476  | -0.020703 | N | -2.394009 | -0.395614 | -0.115281 | C | -0.030469 | 0.689794  | 0.097466 | H | 0.015869  | 1.286427  | 1.017563  | H | 0.176103  | 1.362885 | -0.737708 | C | 1.085394  | -0.361037 | 0.181409 | O | 2.198173  | -0.142849 | -0.208818 | H | 0.804222 | -1.324619 | 0.648626  |   |           |           |           |   |          |           |           |   |          |           |          |   |          |           |           |
| C                                            | -1.358844                                                                                                                                                                                                                                                                                                                                                                                                                                                                                                                                                                                                                                                                                                                                                                                                                                                                                                                                                                                                                                                                                                                                                                                                                          | 0.102476  | -0.020703 |           |           |   |           |           |           |   |           |           |          |   |           |           |           |   |           |          |           |   |           |           |          |   |           |           |           |   |          |           |           |   |           |           |           |   |          |           |           |   |          |           |          |   |          |           |           |
| N                                            | -2.394009                                                                                                                                                                                                                                                                                                                                                                                                                                                                                                                                                                                                                                                                                                                                                                                                                                                                                                                                                                                                                                                                                                                                                                                                                          | -0.395614 | -0.115281 |           |           |   |           |           |           |   |           |           |          |   |           |           |           |   |           |          |           |   |           |           |          |   |           |           |           |   |          |           |           |   |           |           |           |   |          |           |           |   |          |           |          |   |          |           |           |
| C                                            | -0.030469                                                                                                                                                                                                                                                                                                                                                                                                                                                                                                                                                                                                                                                                                                                                                                                                                                                                                                                                                                                                                                                                                                                                                                                                                          | 0.689794  | 0.097466  |           |           |   |           |           |           |   |           |           |          |   |           |           |           |   |           |          |           |   |           |           |          |   |           |           |           |   |          |           |           |   |           |           |           |   |          |           |           |   |          |           |          |   |          |           |           |
| H                                            | 0.015869                                                                                                                                                                                                                                                                                                                                                                                                                                                                                                                                                                                                                                                                                                                                                                                                                                                                                                                                                                                                                                                                                                                                                                                                                           | 1.286427  | 1.017563  |           |           |   |           |           |           |   |           |           |          |   |           |           |           |   |           |          |           |   |           |           |          |   |           |           |           |   |          |           |           |   |           |           |           |   |          |           |           |   |          |           |          |   |          |           |           |
| H                                            | 0.176103                                                                                                                                                                                                                                                                                                                                                                                                                                                                                                                                                                                                                                                                                                                                                                                                                                                                                                                                                                                                                                                                                                                                                                                                                           | 1.362885  | -0.737708 |           |           |   |           |           |           |   |           |           |          |   |           |           |           |   |           |          |           |   |           |           |          |   |           |           |           |   |          |           |           |   |           |           |           |   |          |           |           |   |          |           |          |   |          |           |           |
| C                                            | 1.085394                                                                                                                                                                                                                                                                                                                                                                                                                                                                                                                                                                                                                                                                                                                                                                                                                                                                                                                                                                                                                                                                                                                                                                                                                           | -0.361037 | 0.181409  |           |           |   |           |           |           |   |           |           |          |   |           |           |           |   |           |          |           |   |           |           |          |   |           |           |           |   |          |           |           |   |           |           |           |   |          |           |           |   |          |           |          |   |          |           |           |
| O                                            | 2.198173                                                                                                                                                                                                                                                                                                                                                                                                                                                                                                                                                                                                                                                                                                                                                                                                                                                                                                                                                                                                                                                                                                                                                                                                                           | -0.142849 | -0.208818 |           |           |   |           |           |           |   |           |           |          |   |           |           |           |   |           |          |           |   |           |           |          |   |           |           |           |   |          |           |           |   |           |           |           |   |          |           |           |   |          |           |          |   |          |           |           |
| H                                            | 0.804222                                                                                                                                                                                                                                                                                                                                                                                                                                                                                                                                                                                                                                                                                                                                                                                                                                                                                                                                                                                                                                                                                                                                                                                                                           | -1.324619 | 0.648626  |           |           |   |           |           |           |   |           |           |          |   |           |           |           |   |           |          |           |   |           |           |          |   |           |           |           |   |          |           |           |   |           |           |           |   |          |           |           |   |          |           |          |   |          |           |           |
| <p style="text-align: center;"><b>J</b></p>  | <p>Energy: -168.31278 Hartree, Gibbs free energy: -168.33566 Hartree<br/>                 Dipole: 2.4807. Symmetry: <math>C_s</math>, State: <math>^1A'</math>.<br/>                 Cartesian Coordinates:</p> <table border="1"> <tbody> <tr> <td>C</td> <td>0.000000</td> <td>0.049865</td> <td>0.000000</td> </tr> <tr> <td>O</td> <td>-0.515817</td> <td>1.094973</td> <td>0.000000</td> </tr> <tr> <td>N</td> <td>0.395621</td> <td>-1.095300</td> <td>0.000000</td> </tr> <tr> <td>H</td> <td>1.357192</td> <td>-1.391872</td> <td>0.000000</td> </tr> </tbody> </table>                                                                                                                                                                                                                                                                                                                                                                                                                                                                                                                                                                                                                                                    | C         | 0.000000  | 0.049865  | 0.000000  | O | -0.515817 | 1.094973  | 0.000000  | N | 0.395621  | -1.095300 | 0.000000 | H | 1.357192  | -1.391872 | 0.000000  |   |           |          |           |   |           |           |          |   |           |           |           |   |          |           |           |   |           |           |           |   |          |           |           |   |          |           |          |   |          |           |           |
| C                                            | 0.000000                                                                                                                                                                                                                                                                                                                                                                                                                                                                                                                                                                                                                                                                                                                                                                                                                                                                                                                                                                                                                                                                                                                                                                                                                           | 0.049865  | 0.000000  |           |           |   |           |           |           |   |           |           |          |   |           |           |           |   |           |          |           |   |           |           |          |   |           |           |           |   |          |           |           |   |           |           |           |   |          |           |           |   |          |           |          |   |          |           |           |
| O                                            | -0.515817                                                                                                                                                                                                                                                                                                                                                                                                                                                                                                                                                                                                                                                                                                                                                                                                                                                                                                                                                                                                                                                                                                                                                                                                                          | 1.094973  | 0.000000  |           |           |   |           |           |           |   |           |           |          |   |           |           |           |   |           |          |           |   |           |           |          |   |           |           |           |   |          |           |           |   |           |           |           |   |          |           |           |   |          |           |          |   |          |           |           |
| N                                            | 0.395621                                                                                                                                                                                                                                                                                                                                                                                                                                                                                                                                                                                                                                                                                                                                                                                                                                                                                                                                                                                                                                                                                                                                                                                                                           | -1.095300 | 0.000000  |           |           |   |           |           |           |   |           |           |          |   |           |           |           |   |           |          |           |   |           |           |          |   |           |           |           |   |          |           |           |   |           |           |           |   |          |           |           |   |          |           |          |   |          |           |           |
| H                                            | 1.357192                                                                                                                                                                                                                                                                                                                                                                                                                                                                                                                                                                                                                                                                                                                                                                                                                                                                                                                                                                                                                                                                                                                                                                                                                           | -1.391872 | 0.000000  |           |           |   |           |           |           |   |           |           |          |   |           |           |           |   |           |          |           |   |           |           |          |   |           |           |           |   |          |           |           |   |           |           |           |   |          |           |           |   |          |           |          |   |          |           |           |
| <p style="text-align: center;"><b>K1</b></p> | <p>Energy: -268.32246 Hartree, Gibbs free energy: -268.35493 Hartree<br/>                 Dipole: 3.9302. Symmetry: <math>C_1</math>, State: <math>^1A</math>.<br/>                 Cartesian Coordinates:</p> <table border="1"> <tbody> <tr> <td>C</td> <td>-2.706993</td> <td>-0.496851</td> <td>0.017744</td> </tr> <tr> <td>H</td> <td>-2.357099</td> <td>-1.531006</td> <td>-0.099293</td> </tr> <tr> <td>H</td> <td>-3.321294</td> <td>-0.475128</td> <td>0.935169</td> </tr> <tr> <td>H</td> <td>-3.406458</td> <td>-0.306090</td> <td>-0.815202</td> </tr> <tr> <td>C</td> <td>-0.235064</td> <td>0.034979</td> <td>-0.060281</td> </tr> <tr> <td>C</td> <td>-1.536163</td> <td>0.447098</td> <td>0.051529</td> </tr> <tr> <td>H</td> <td>-1.736534</td> <td>1.512132</td> <td>0.162860</td> </tr> <tr> <td>O</td> <td>0.844418</td> <td>0.737805</td> <td>-0.051302</td> </tr> <tr> <td>H</td> <td>-0.110349</td> <td>-1.068656</td> <td>-0.174964</td> </tr> <tr> <td>O</td> <td>3.177257</td> <td>-0.444544</td> <td>-0.051964</td> </tr> <tr> <td>H</td> <td>3.360941</td> <td>-0.388169</td> <td>0.889313</td> </tr> <tr> <td>H</td> <td>2.266708</td> <td>-0.000522</td> <td>-0.125704</td> </tr> </tbody> </table> | C         | -2.706993 | -0.496851 | 0.017744  | H | -2.357099 | -1.531006 | -0.099293 | H | -3.321294 | -0.475128 | 0.935169 | H | -3.406458 | -0.306090 | -0.815202 | C | -0.235064 | 0.034979 | -0.060281 | C | -1.536163 | 0.447098  | 0.051529 | H | -1.736534 | 1.512132  | 0.162860  | O | 0.844418 | 0.737805  | -0.051302 | H | -0.110349 | -1.068656 | -0.174964 | O | 3.177257 | -0.444544 | -0.051964 | H | 3.360941 | -0.388169 | 0.889313 | H | 2.266708 | -0.000522 | -0.125704 |
| C                                            | -2.706993                                                                                                                                                                                                                                                                                                                                                                                                                                                                                                                                                                                                                                                                                                                                                                                                                                                                                                                                                                                                                                                                                                                                                                                                                          | -0.496851 | 0.017744  |           |           |   |           |           |           |   |           |           |          |   |           |           |           |   |           |          |           |   |           |           |          |   |           |           |           |   |          |           |           |   |           |           |           |   |          |           |           |   |          |           |          |   |          |           |           |
| H                                            | -2.357099                                                                                                                                                                                                                                                                                                                                                                                                                                                                                                                                                                                                                                                                                                                                                                                                                                                                                                                                                                                                                                                                                                                                                                                                                          | -1.531006 | -0.099293 |           |           |   |           |           |           |   |           |           |          |   |           |           |           |   |           |          |           |   |           |           |          |   |           |           |           |   |          |           |           |   |           |           |           |   |          |           |           |   |          |           |          |   |          |           |           |
| H                                            | -3.321294                                                                                                                                                                                                                                                                                                                                                                                                                                                                                                                                                                                                                                                                                                                                                                                                                                                                                                                                                                                                                                                                                                                                                                                                                          | -0.475128 | 0.935169  |           |           |   |           |           |           |   |           |           |          |   |           |           |           |   |           |          |           |   |           |           |          |   |           |           |           |   |          |           |           |   |           |           |           |   |          |           |           |   |          |           |          |   |          |           |           |
| H                                            | -3.406458                                                                                                                                                                                                                                                                                                                                                                                                                                                                                                                                                                                                                                                                                                                                                                                                                                                                                                                                                                                                                                                                                                                                                                                                                          | -0.306090 | -0.815202 |           |           |   |           |           |           |   |           |           |          |   |           |           |           |   |           |          |           |   |           |           |          |   |           |           |           |   |          |           |           |   |           |           |           |   |          |           |           |   |          |           |          |   |          |           |           |
| C                                            | -0.235064                                                                                                                                                                                                                                                                                                                                                                                                                                                                                                                                                                                                                                                                                                                                                                                                                                                                                                                                                                                                                                                                                                                                                                                                                          | 0.034979  | -0.060281 |           |           |   |           |           |           |   |           |           |          |   |           |           |           |   |           |          |           |   |           |           |          |   |           |           |           |   |          |           |           |   |           |           |           |   |          |           |           |   |          |           |          |   |          |           |           |
| C                                            | -1.536163                                                                                                                                                                                                                                                                                                                                                                                                                                                                                                                                                                                                                                                                                                                                                                                                                                                                                                                                                                                                                                                                                                                                                                                                                          | 0.447098  | 0.051529  |           |           |   |           |           |           |   |           |           |          |   |           |           |           |   |           |          |           |   |           |           |          |   |           |           |           |   |          |           |           |   |           |           |           |   |          |           |           |   |          |           |          |   |          |           |           |
| H                                            | -1.736534                                                                                                                                                                                                                                                                                                                                                                                                                                                                                                                                                                                                                                                                                                                                                                                                                                                                                                                                                                                                                                                                                                                                                                                                                          | 1.512132  | 0.162860  |           |           |   |           |           |           |   |           |           |          |   |           |           |           |   |           |          |           |   |           |           |          |   |           |           |           |   |          |           |           |   |           |           |           |   |          |           |           |   |          |           |          |   |          |           |           |
| O                                            | 0.844418                                                                                                                                                                                                                                                                                                                                                                                                                                                                                                                                                                                                                                                                                                                                                                                                                                                                                                                                                                                                                                                                                                                                                                                                                           | 0.737805  | -0.051302 |           |           |   |           |           |           |   |           |           |          |   |           |           |           |   |           |          |           |   |           |           |          |   |           |           |           |   |          |           |           |   |           |           |           |   |          |           |           |   |          |           |          |   |          |           |           |
| H                                            | -0.110349                                                                                                                                                                                                                                                                                                                                                                                                                                                                                                                                                                                                                                                                                                                                                                                                                                                                                                                                                                                                                                                                                                                                                                                                                          | -1.068656 | -0.174964 |           |           |   |           |           |           |   |           |           |          |   |           |           |           |   |           |          |           |   |           |           |          |   |           |           |           |   |          |           |           |   |           |           |           |   |          |           |           |   |          |           |          |   |          |           |           |
| O                                            | 3.177257                                                                                                                                                                                                                                                                                                                                                                                                                                                                                                                                                                                                                                                                                                                                                                                                                                                                                                                                                                                                                                                                                                                                                                                                                           | -0.444544 | -0.051964 |           |           |   |           |           |           |   |           |           |          |   |           |           |           |   |           |          |           |   |           |           |          |   |           |           |           |   |          |           |           |   |           |           |           |   |          |           |           |   |          |           |          |   |          |           |           |
| H                                            | 3.360941                                                                                                                                                                                                                                                                                                                                                                                                                                                                                                                                                                                                                                                                                                                                                                                                                                                                                                                                                                                                                                                                                                                                                                                                                           | -0.388169 | 0.889313  |           |           |   |           |           |           |   |           |           |          |   |           |           |           |   |           |          |           |   |           |           |          |   |           |           |           |   |          |           |           |   |           |           |           |   |          |           |           |   |          |           |          |   |          |           |           |
| H                                            | 2.266708                                                                                                                                                                                                                                                                                                                                                                                                                                                                                                                                                                                                                                                                                                                                                                                                                                                                                                                                                                                                                                                                                                                                                                                                                           | -0.000522 | -0.125704 |           |           |   |           |           |           |   |           |           |          |   |           |           |           |   |           |          |           |   |           |           |          |   |           |           |           |   |          |           |           |   |           |           |           |   |          |           |           |   |          |           |          |   |          |           |           |

Table S1-7 Continued.

|                                              |                                                                                                                                                                                                                                                                                                                                                                                                                                                                                                                                                                                                                                                                                                                                                                                                                                                                                                                                                                                                                                                                                                                                                                                                                                           |           |           |           |           |   |           |           |           |   |           |           |           |   |           |           |          |   |           |           |           |   |           |           |          |   |           |           |           |   |           |           |           |   |           |           |           |   |          |           |           |   |           |           |           |   |           |           |           |   |           |           |          |
|----------------------------------------------|-------------------------------------------------------------------------------------------------------------------------------------------------------------------------------------------------------------------------------------------------------------------------------------------------------------------------------------------------------------------------------------------------------------------------------------------------------------------------------------------------------------------------------------------------------------------------------------------------------------------------------------------------------------------------------------------------------------------------------------------------------------------------------------------------------------------------------------------------------------------------------------------------------------------------------------------------------------------------------------------------------------------------------------------------------------------------------------------------------------------------------------------------------------------------------------------------------------------------------------------|-----------|-----------|-----------|-----------|---|-----------|-----------|-----------|---|-----------|-----------|-----------|---|-----------|-----------|----------|---|-----------|-----------|-----------|---|-----------|-----------|----------|---|-----------|-----------|-----------|---|-----------|-----------|-----------|---|-----------|-----------|-----------|---|----------|-----------|-----------|---|-----------|-----------|-----------|---|-----------|-----------|-----------|---|-----------|-----------|----------|
| <p style="text-align: center;"><b>K2</b></p> | <p>Energy: -268.32476 Hartree, Gibbs free energy: -268.35796 Hartree,<br/>                     Dipole: 2.9183. Symmetry: C<sub>1</sub>, State: <sup>1</sup>A.<br/>                     Cartesian Coordinates:</p> <table border="1"> <tbody> <tr><td>C</td><td>-1.926990</td><td>1.891692</td><td>0.227157</td></tr> <tr><td>H</td><td>-1.020987</td><td>2.504903</td><td>0.229247</td></tr> <tr><td>H</td><td>-2.577424</td><td>2.266711</td><td>-0.580760</td></tr> <tr><td>H</td><td>-2.463028</td><td>2.091257</td><td>1.170392</td></tr> <tr><td>C</td><td>-0.242916</td><td>0.025999</td><td>-0.065571</td></tr> <tr><td>C</td><td>-1.541953</td><td>0.447354</td><td>0.056599</td></tr> <tr><td>H</td><td>-2.326099</td><td>-0.306233</td><td>0.023737</td></tr> <tr><td>O</td><td>0.834117</td><td>0.736494</td><td>-0.057003</td></tr> <tr><td>H</td><td>-0.118898</td><td>-1.072426</td><td>-0.187328</td></tr> <tr><td>O</td><td>3.177411</td><td>-0.427876</td><td>-0.046338</td></tr> <tr><td>H</td><td>3.348580</td><td>-0.381521</td><td>0.897856</td></tr> <tr><td>H</td><td>2.264658</td><td>0.009167</td><td>-0.126211</td></tr> </tbody> </table>                                                                      | C         | -1.926990 | 1.891692  | 0.227157  | H | -1.020987 | 2.504903  | 0.229247  | H | -2.577424 | 2.266711  | -0.580760 | H | -2.463028 | 2.091257  | 1.170392 | C | -0.242916 | 0.025999  | -0.065571 | C | -1.541953 | 0.447354  | 0.056599 | H | -2.326099 | -0.306233 | 0.023737  | O | 0.834117  | 0.736494  | -0.057003 | H | -0.118898 | -1.072426 | -0.187328 | O | 3.177411 | -0.427876 | -0.046338 | H | 3.348580  | -0.381521 | 0.897856  | H | 2.264658  | 0.009167  | -0.126211 |   |           |           |          |
| C                                            | -1.926990                                                                                                                                                                                                                                                                                                                                                                                                                                                                                                                                                                                                                                                                                                                                                                                                                                                                                                                                                                                                                                                                                                                                                                                                                                 | 1.891692  | 0.227157  |           |           |   |           |           |           |   |           |           |           |   |           |           |          |   |           |           |           |   |           |           |          |   |           |           |           |   |           |           |           |   |           |           |           |   |          |           |           |   |           |           |           |   |           |           |           |   |           |           |          |
| H                                            | -1.020987                                                                                                                                                                                                                                                                                                                                                                                                                                                                                                                                                                                                                                                                                                                                                                                                                                                                                                                                                                                                                                                                                                                                                                                                                                 | 2.504903  | 0.229247  |           |           |   |           |           |           |   |           |           |           |   |           |           |          |   |           |           |           |   |           |           |          |   |           |           |           |   |           |           |           |   |           |           |           |   |          |           |           |   |           |           |           |   |           |           |           |   |           |           |          |
| H                                            | -2.577424                                                                                                                                                                                                                                                                                                                                                                                                                                                                                                                                                                                                                                                                                                                                                                                                                                                                                                                                                                                                                                                                                                                                                                                                                                 | 2.266711  | -0.580760 |           |           |   |           |           |           |   |           |           |           |   |           |           |          |   |           |           |           |   |           |           |          |   |           |           |           |   |           |           |           |   |           |           |           |   |          |           |           |   |           |           |           |   |           |           |           |   |           |           |          |
| H                                            | -2.463028                                                                                                                                                                                                                                                                                                                                                                                                                                                                                                                                                                                                                                                                                                                                                                                                                                                                                                                                                                                                                                                                                                                                                                                                                                 | 2.091257  | 1.170392  |           |           |   |           |           |           |   |           |           |           |   |           |           |          |   |           |           |           |   |           |           |          |   |           |           |           |   |           |           |           |   |           |           |           |   |          |           |           |   |           |           |           |   |           |           |           |   |           |           |          |
| C                                            | -0.242916                                                                                                                                                                                                                                                                                                                                                                                                                                                                                                                                                                                                                                                                                                                                                                                                                                                                                                                                                                                                                                                                                                                                                                                                                                 | 0.025999  | -0.065571 |           |           |   |           |           |           |   |           |           |           |   |           |           |          |   |           |           |           |   |           |           |          |   |           |           |           |   |           |           |           |   |           |           |           |   |          |           |           |   |           |           |           |   |           |           |           |   |           |           |          |
| C                                            | -1.541953                                                                                                                                                                                                                                                                                                                                                                                                                                                                                                                                                                                                                                                                                                                                                                                                                                                                                                                                                                                                                                                                                                                                                                                                                                 | 0.447354  | 0.056599  |           |           |   |           |           |           |   |           |           |           |   |           |           |          |   |           |           |           |   |           |           |          |   |           |           |           |   |           |           |           |   |           |           |           |   |          |           |           |   |           |           |           |   |           |           |           |   |           |           |          |
| H                                            | -2.326099                                                                                                                                                                                                                                                                                                                                                                                                                                                                                                                                                                                                                                                                                                                                                                                                                                                                                                                                                                                                                                                                                                                                                                                                                                 | -0.306233 | 0.023737  |           |           |   |           |           |           |   |           |           |           |   |           |           |          |   |           |           |           |   |           |           |          |   |           |           |           |   |           |           |           |   |           |           |           |   |          |           |           |   |           |           |           |   |           |           |           |   |           |           |          |
| O                                            | 0.834117                                                                                                                                                                                                                                                                                                                                                                                                                                                                                                                                                                                                                                                                                                                                                                                                                                                                                                                                                                                                                                                                                                                                                                                                                                  | 0.736494  | -0.057003 |           |           |   |           |           |           |   |           |           |           |   |           |           |          |   |           |           |           |   |           |           |          |   |           |           |           |   |           |           |           |   |           |           |           |   |          |           |           |   |           |           |           |   |           |           |           |   |           |           |          |
| H                                            | -0.118898                                                                                                                                                                                                                                                                                                                                                                                                                                                                                                                                                                                                                                                                                                                                                                                                                                                                                                                                                                                                                                                                                                                                                                                                                                 | -1.072426 | -0.187328 |           |           |   |           |           |           |   |           |           |           |   |           |           |          |   |           |           |           |   |           |           |          |   |           |           |           |   |           |           |           |   |           |           |           |   |          |           |           |   |           |           |           |   |           |           |           |   |           |           |          |
| O                                            | 3.177411                                                                                                                                                                                                                                                                                                                                                                                                                                                                                                                                                                                                                                                                                                                                                                                                                                                                                                                                                                                                                                                                                                                                                                                                                                  | -0.427876 | -0.046338 |           |           |   |           |           |           |   |           |           |           |   |           |           |          |   |           |           |           |   |           |           |          |   |           |           |           |   |           |           |           |   |           |           |           |   |          |           |           |   |           |           |           |   |           |           |           |   |           |           |          |
| H                                            | 3.348580                                                                                                                                                                                                                                                                                                                                                                                                                                                                                                                                                                                                                                                                                                                                                                                                                                                                                                                                                                                                                                                                                                                                                                                                                                  | -0.381521 | 0.897856  |           |           |   |           |           |           |   |           |           |           |   |           |           |          |   |           |           |           |   |           |           |          |   |           |           |           |   |           |           |           |   |           |           |           |   |          |           |           |   |           |           |           |   |           |           |           |   |           |           |          |
| H                                            | 2.264658                                                                                                                                                                                                                                                                                                                                                                                                                                                                                                                                                                                                                                                                                                                                                                                                                                                                                                                                                                                                                                                                                                                                                                                                                                  | 0.009167  | -0.126211 |           |           |   |           |           |           |   |           |           |           |   |           |           |          |   |           |           |           |   |           |           |          |   |           |           |           |   |           |           |           |   |           |           |           |   |          |           |           |   |           |           |           |   |           |           |           |   |           |           |          |
| <p style="text-align: center;"><b>L</b></p>  | <p>Energy: -152.53634 Hartree, Gibbs free energy: -152.56244 Hartree<br/>                     Dipole: 3.2308. Symmetry: C<sub>1</sub>, State: <sup>1</sup>A.<br/>                     Cartesian Coordinates:</p> <table border="1"> <tbody> <tr><td>H</td><td>1.798901</td><td>0.767356</td><td>-0.299289</td></tr> <tr><td>O</td><td>-1.517976</td><td>0.000140</td><td>-0.119864</td></tr> <tr><td>H</td><td>-1.891210</td><td>-0.000936</td><td>0.765824</td></tr> <tr><td>O</td><td>1.374223</td><td>-0.000099</td><td>0.097988</td></tr> <tr><td>H</td><td>1.798976</td><td>-0.766756</td><td>-0.300735</td></tr> <tr><td>H</td><td>-0.556648</td><td>0.000011</td><td>0.009202</td></tr> </tbody> </table>                                                                                                                                                                                                                                                                                                                                                                                                                                                                                                                          | H         | 1.798901  | 0.767356  | -0.299289 | O | -1.517976 | 0.000140  | -0.119864 | H | -1.891210 | -0.000936 | 0.765824  | O | 1.374223  | -0.000099 | 0.097988 | H | 1.798976  | -0.766756 | -0.300735 | H | -0.556648 | 0.000011  | 0.009202 |   |           |           |           |   |           |           |           |   |           |           |           |   |          |           |           |   |           |           |           |   |           |           |           |   |           |           |          |
| H                                            | 1.798901                                                                                                                                                                                                                                                                                                                                                                                                                                                                                                                                                                                                                                                                                                                                                                                                                                                                                                                                                                                                                                                                                                                                                                                                                                  | 0.767356  | -0.299289 |           |           |   |           |           |           |   |           |           |           |   |           |           |          |   |           |           |           |   |           |           |          |   |           |           |           |   |           |           |           |   |           |           |           |   |          |           |           |   |           |           |           |   |           |           |           |   |           |           |          |
| O                                            | -1.517976                                                                                                                                                                                                                                                                                                                                                                                                                                                                                                                                                                                                                                                                                                                                                                                                                                                                                                                                                                                                                                                                                                                                                                                                                                 | 0.000140  | -0.119864 |           |           |   |           |           |           |   |           |           |           |   |           |           |          |   |           |           |           |   |           |           |          |   |           |           |           |   |           |           |           |   |           |           |           |   |          |           |           |   |           |           |           |   |           |           |           |   |           |           |          |
| H                                            | -1.891210                                                                                                                                                                                                                                                                                                                                                                                                                                                                                                                                                                                                                                                                                                                                                                                                                                                                                                                                                                                                                                                                                                                                                                                                                                 | -0.000936 | 0.765824  |           |           |   |           |           |           |   |           |           |           |   |           |           |          |   |           |           |           |   |           |           |          |   |           |           |           |   |           |           |           |   |           |           |           |   |          |           |           |   |           |           |           |   |           |           |           |   |           |           |          |
| O                                            | 1.374223                                                                                                                                                                                                                                                                                                                                                                                                                                                                                                                                                                                                                                                                                                                                                                                                                                                                                                                                                                                                                                                                                                                                                                                                                                  | -0.000099 | 0.097988  |           |           |   |           |           |           |   |           |           |           |   |           |           |          |   |           |           |           |   |           |           |          |   |           |           |           |   |           |           |           |   |           |           |           |   |          |           |           |   |           |           |           |   |           |           |           |   |           |           |          |
| H                                            | 1.798976                                                                                                                                                                                                                                                                                                                                                                                                                                                                                                                                                                                                                                                                                                                                                                                                                                                                                                                                                                                                                                                                                                                                                                                                                                  | -0.766756 | -0.300735 |           |           |   |           |           |           |   |           |           |           |   |           |           |          |   |           |           |           |   |           |           |          |   |           |           |           |   |           |           |           |   |           |           |           |   |          |           |           |   |           |           |           |   |           |           |           |   |           |           |          |
| H                                            | -0.556648                                                                                                                                                                                                                                                                                                                                                                                                                                                                                                                                                                                                                                                                                                                                                                                                                                                                                                                                                                                                                                                                                                                                                                                                                                 | 0.000011  | 0.009202  |           |           |   |           |           |           |   |           |           |           |   |           |           |          |   |           |           |           |   |           |           |          |   |           |           |           |   |           |           |           |   |           |           |           |   |          |           |           |   |           |           |           |   |           |           |           |   |           |           |          |
| <p style="text-align: center;"><b>M</b></p>  | <p>Energy: -151.94655 Hartree, Gibbs free energy: -151.97057 Hartree<br/>                     Dipole: 2.2031. Symmetry: C<sub>1</sub>, Charge: -1, State: <sup>1</sup>A.<br/>                     Cartesian Coordinates:</p> <table border="1"> <tbody> <tr><td>H</td><td>-0.117403</td><td>-0.039734</td><td>-0.077778</td></tr> <tr><td>O</td><td>1.236343</td><td>0.096420</td><td>-0.061885</td></tr> <tr><td>O</td><td>-1.233725</td><td>-0.100702</td><td>-0.049039</td></tr> <tr><td>H</td><td>-1.473728</td><td>0.679528</td><td>0.458801</td></tr> <tr><td>H</td><td>1.570182</td><td>-0.605538</td><td>0.506375</td></tr> </tbody> </table>                                                                                                                                                                                                                                                                                                                                                                                                                                                                                                                                                                                     | H         | -0.117403 | -0.039734 | -0.077778 | O | 1.236343  | 0.096420  | -0.061885 | O | -1.233725 | -0.100702 | -0.049039 | H | -1.473728 | 0.679528  | 0.458801 | H | 1.570182  | -0.605538 | 0.506375  |   |           |           |          |   |           |           |           |   |           |           |           |   |           |           |           |   |          |           |           |   |           |           |           |   |           |           |           |   |           |           |          |
| H                                            | -0.117403                                                                                                                                                                                                                                                                                                                                                                                                                                                                                                                                                                                                                                                                                                                                                                                                                                                                                                                                                                                                                                                                                                                                                                                                                                 | -0.039734 | -0.077778 |           |           |   |           |           |           |   |           |           |           |   |           |           |          |   |           |           |           |   |           |           |          |   |           |           |           |   |           |           |           |   |           |           |           |   |          |           |           |   |           |           |           |   |           |           |           |   |           |           |          |
| O                                            | 1.236343                                                                                                                                                                                                                                                                                                                                                                                                                                                                                                                                                                                                                                                                                                                                                                                                                                                                                                                                                                                                                                                                                                                                                                                                                                  | 0.096420  | -0.061885 |           |           |   |           |           |           |   |           |           |           |   |           |           |          |   |           |           |           |   |           |           |          |   |           |           |           |   |           |           |           |   |           |           |           |   |          |           |           |   |           |           |           |   |           |           |           |   |           |           |          |
| O                                            | -1.233725                                                                                                                                                                                                                                                                                                                                                                                                                                                                                                                                                                                                                                                                                                                                                                                                                                                                                                                                                                                                                                                                                                                                                                                                                                 | -0.100702 | -0.049039 |           |           |   |           |           |           |   |           |           |           |   |           |           |          |   |           |           |           |   |           |           |          |   |           |           |           |   |           |           |           |   |           |           |           |   |          |           |           |   |           |           |           |   |           |           |           |   |           |           |          |
| H                                            | -1.473728                                                                                                                                                                                                                                                                                                                                                                                                                                                                                                                                                                                                                                                                                                                                                                                                                                                                                                                                                                                                                                                                                                                                                                                                                                 | 0.679528  | 0.458801  |           |           |   |           |           |           |   |           |           |           |   |           |           |          |   |           |           |           |   |           |           |          |   |           |           |           |   |           |           |           |   |           |           |           |   |          |           |           |   |           |           |           |   |           |           |           |   |           |           |          |
| H                                            | 1.570182                                                                                                                                                                                                                                                                                                                                                                                                                                                                                                                                                                                                                                                                                                                                                                                                                                                                                                                                                                                                                                                                                                                                                                                                                                  | -0.605538 | 0.506375  |           |           |   |           |           |           |   |           |           |           |   |           |           |          |   |           |           |           |   |           |           |          |   |           |           |           |   |           |           |           |   |           |           |           |   |          |           |           |   |           |           |           |   |           |           |           |   |           |           |          |
| <p style="text-align: center;"><b>4</b></p>  | <p>Energy: -393.96106 Hartree, Gibbs free energy: -393.99198 Hartree<br/>                     Dipole: 7.4392. Symmetry: C<sub>1</sub>, State: <sup>1</sup>A.<br/>                     Cartesian Coordinates:</p> <table border="1"> <tbody> <tr><td>C</td><td>1.185736</td><td>-0.530651</td><td>0.000159</td></tr> <tr><td>O</td><td>2.215502</td><td>-1.177460</td><td>0.001128</td></tr> <tr><td>N</td><td>1.281479</td><td>0.894191</td><td>0.000156</td></tr> <tr><td>H</td><td>2.221621</td><td>1.263172</td><td>0.000831</td></tr> <tr><td>H</td><td>0.394537</td><td>2.778180</td><td>0.001545</td></tr> <tr><td>N</td><td>-0.081766</td><td>-1.048569</td><td>0.002373</td></tr> <tr><td>H</td><td>-1.925590</td><td>1.815507</td><td>-0.005814</td></tr> <tr><td>C</td><td>-1.130192</td><td>-0.251642</td><td>-0.001497</td></tr> <tr><td>C</td><td>-1.047727</td><td>1.185699</td><td>0.000330</td></tr> <tr><td>C</td><td>0.202368</td><td>1.712056</td><td>0.001013</td></tr> <tr><td>N</td><td>-2.355225</td><td>-0.841992</td><td>-0.028757</td></tr> <tr><td>H</td><td>-2.391304</td><td>-1.845105</td><td>0.062874</td></tr> <tr><td>H</td><td>-3.195810</td><td>-0.310252</td><td>0.115110</td></tr> </tbody> </table> | C         | 1.185736  | -0.530651 | 0.000159  | O | 2.215502  | -1.177460 | 0.001128  | N | 1.281479  | 0.894191  | 0.000156  | H | 2.221621  | 1.263172  | 0.000831 | H | 0.394537  | 2.778180  | 0.001545  | N | -0.081766 | -1.048569 | 0.002373 | H | -1.925590 | 1.815507  | -0.005814 | C | -1.130192 | -0.251642 | -0.001497 | C | -1.047727 | 1.185699  | 0.000330  | C | 0.202368 | 1.712056  | 0.001013  | N | -2.355225 | -0.841992 | -0.028757 | H | -2.391304 | -1.845105 | 0.062874  | H | -3.195810 | -0.310252 | 0.115110 |
| C                                            | 1.185736                                                                                                                                                                                                                                                                                                                                                                                                                                                                                                                                                                                                                                                                                                                                                                                                                                                                                                                                                                                                                                                                                                                                                                                                                                  | -0.530651 | 0.000159  |           |           |   |           |           |           |   |           |           |           |   |           |           |          |   |           |           |           |   |           |           |          |   |           |           |           |   |           |           |           |   |           |           |           |   |          |           |           |   |           |           |           |   |           |           |           |   |           |           |          |
| O                                            | 2.215502                                                                                                                                                                                                                                                                                                                                                                                                                                                                                                                                                                                                                                                                                                                                                                                                                                                                                                                                                                                                                                                                                                                                                                                                                                  | -1.177460 | 0.001128  |           |           |   |           |           |           |   |           |           |           |   |           |           |          |   |           |           |           |   |           |           |          |   |           |           |           |   |           |           |           |   |           |           |           |   |          |           |           |   |           |           |           |   |           |           |           |   |           |           |          |
| N                                            | 1.281479                                                                                                                                                                                                                                                                                                                                                                                                                                                                                                                                                                                                                                                                                                                                                                                                                                                                                                                                                                                                                                                                                                                                                                                                                                  | 0.894191  | 0.000156  |           |           |   |           |           |           |   |           |           |           |   |           |           |          |   |           |           |           |   |           |           |          |   |           |           |           |   |           |           |           |   |           |           |           |   |          |           |           |   |           |           |           |   |           |           |           |   |           |           |          |
| H                                            | 2.221621                                                                                                                                                                                                                                                                                                                                                                                                                                                                                                                                                                                                                                                                                                                                                                                                                                                                                                                                                                                                                                                                                                                                                                                                                                  | 1.263172  | 0.000831  |           |           |   |           |           |           |   |           |           |           |   |           |           |          |   |           |           |           |   |           |           |          |   |           |           |           |   |           |           |           |   |           |           |           |   |          |           |           |   |           |           |           |   |           |           |           |   |           |           |          |
| H                                            | 0.394537                                                                                                                                                                                                                                                                                                                                                                                                                                                                                                                                                                                                                                                                                                                                                                                                                                                                                                                                                                                                                                                                                                                                                                                                                                  | 2.778180  | 0.001545  |           |           |   |           |           |           |   |           |           |           |   |           |           |          |   |           |           |           |   |           |           |          |   |           |           |           |   |           |           |           |   |           |           |           |   |          |           |           |   |           |           |           |   |           |           |           |   |           |           |          |
| N                                            | -0.081766                                                                                                                                                                                                                                                                                                                                                                                                                                                                                                                                                                                                                                                                                                                                                                                                                                                                                                                                                                                                                                                                                                                                                                                                                                 | -1.048569 | 0.002373  |           |           |   |           |           |           |   |           |           |           |   |           |           |          |   |           |           |           |   |           |           |          |   |           |           |           |   |           |           |           |   |           |           |           |   |          |           |           |   |           |           |           |   |           |           |           |   |           |           |          |
| H                                            | -1.925590                                                                                                                                                                                                                                                                                                                                                                                                                                                                                                                                                                                                                                                                                                                                                                                                                                                                                                                                                                                                                                                                                                                                                                                                                                 | 1.815507  | -0.005814 |           |           |   |           |           |           |   |           |           |           |   |           |           |          |   |           |           |           |   |           |           |          |   |           |           |           |   |           |           |           |   |           |           |           |   |          |           |           |   |           |           |           |   |           |           |           |   |           |           |          |
| C                                            | -1.130192                                                                                                                                                                                                                                                                                                                                                                                                                                                                                                                                                                                                                                                                                                                                                                                                                                                                                                                                                                                                                                                                                                                                                                                                                                 | -0.251642 | -0.001497 |           |           |   |           |           |           |   |           |           |           |   |           |           |          |   |           |           |           |   |           |           |          |   |           |           |           |   |           |           |           |   |           |           |           |   |          |           |           |   |           |           |           |   |           |           |           |   |           |           |          |
| C                                            | -1.047727                                                                                                                                                                                                                                                                                                                                                                                                                                                                                                                                                                                                                                                                                                                                                                                                                                                                                                                                                                                                                                                                                                                                                                                                                                 | 1.185699  | 0.000330  |           |           |   |           |           |           |   |           |           |           |   |           |           |          |   |           |           |           |   |           |           |          |   |           |           |           |   |           |           |           |   |           |           |           |   |          |           |           |   |           |           |           |   |           |           |           |   |           |           |          |
| C                                            | 0.202368                                                                                                                                                                                                                                                                                                                                                                                                                                                                                                                                                                                                                                                                                                                                                                                                                                                                                                                                                                                                                                                                                                                                                                                                                                  | 1.712056  | 0.001013  |           |           |   |           |           |           |   |           |           |           |   |           |           |          |   |           |           |           |   |           |           |          |   |           |           |           |   |           |           |           |   |           |           |           |   |          |           |           |   |           |           |           |   |           |           |           |   |           |           |          |
| N                                            | -2.355225                                                                                                                                                                                                                                                                                                                                                                                                                                                                                                                                                                                                                                                                                                                                                                                                                                                                                                                                                                                                                                                                                                                                                                                                                                 | -0.841992 | -0.028757 |           |           |   |           |           |           |   |           |           |           |   |           |           |          |   |           |           |           |   |           |           |          |   |           |           |           |   |           |           |           |   |           |           |           |   |          |           |           |   |           |           |           |   |           |           |           |   |           |           |          |
| H                                            | -2.391304                                                                                                                                                                                                                                                                                                                                                                                                                                                                                                                                                                                                                                                                                                                                                                                                                                                                                                                                                                                                                                                                                                                                                                                                                                 | -1.845105 | 0.062874  |           |           |   |           |           |           |   |           |           |           |   |           |           |          |   |           |           |           |   |           |           |          |   |           |           |           |   |           |           |           |   |           |           |           |   |          |           |           |   |           |           |           |   |           |           |           |   |           |           |          |
| H                                            | -3.195810                                                                                                                                                                                                                                                                                                                                                                                                                                                                                                                                                                                                                                                                                                                                                                                                                                                                                                                                                                                                                                                                                                                                                                                                                                 | -0.310252 | 0.115110  |           |           |   |           |           |           |   |           |           |           |   |           |           |          |   |           |           |           |   |           |           |          |   |           |           |           |   |           |           |           |   |           |           |           |   |          |           |           |   |           |           |           |   |           |           |           |   |           |           |          |

Table S1-7 Continued.

|                                                                                                                                  |           |                                                                               |           |
|----------------------------------------------------------------------------------------------------------------------------------|-----------|-------------------------------------------------------------------------------|-----------|
| 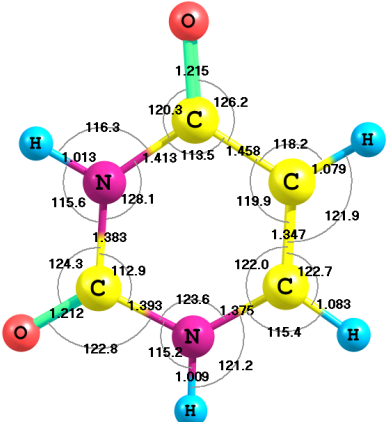 <p style="text-align: center;"><b>8</b></p>    |           | Energy: -413.83964 Hartree, Gibbs free energy: -413.87013 Hartree             |           |
|                                                                                                                                  |           | Dipole: 5.0698. Symmetry: C <sub>1</sub> , State: <sup>1</sup> A.             |           |
|  <p style="text-align: center;"><b>8a</b></p>  |           | Energy: -413.82191 Hartree, Gibbs free energy: -413.85227 Hartree             |           |
|                                                                                                                                  |           | Dipole: 5.5725. Symmetry: C <sub>1</sub> , State: <sup>1</sup> A.             |           |
|  <p style="text-align: center;"><b>39</b></p> |           | Energy: -452.49515 Hartree, Gibbs free energy: -452.52756 Hartree             |           |
|                                                                                                                                  |           | Dipole: 4.5829. Symmetry: C <sub>1</sub> , State: <sup>1</sup> A, Charge: -1. |           |
| Cartesian Coordinates:                                                                                                           |           |                                                                               |           |
| C                                                                                                                                | -0.363242 | 1.373763                                                                      | -1.016098 |
| O                                                                                                                                | 0.834910  | 1.227329                                                                      | -1.128083 |
| N                                                                                                                                | -1.025152 | 2.526230                                                                      | -1.434764 |
| H                                                                                                                                | -0.434954 | 3.236671                                                                      | -1.840882 |
| H                                                                                                                                | -2.756192 | 3.656407                                                                      | -1.684949 |
| N                                                                                                                                | -1.215792 | 0.432589                                                                      | -0.467583 |
| H                                                                                                                                | -4.249852 | 1.916672                                                                      | -0.683454 |
| H                                                                                                                                | -0.776765 | -0.422573                                                                     | -0.148884 |
| C                                                                                                                                | -2.615605 | 0.517121                                                                      | -0.298157 |
| O                                                                                                                                | -3.228628 | -0.403247                                                                     | 0.205172  |
| C                                                                                                                                | -3.184496 | 1.771591                                                                      | -0.776156 |
| C                                                                                                                                | -2.382247 | 2.709743                                                                      | -1.315699 |
| Cartesian Coordinates:                                                                                                           |           |                                                                               |           |
| C                                                                                                                                | -0.422045 | 1.304179                                                                      | -0.975966 |
| O                                                                                                                                | 0.779120  | 1.195366                                                                      | -1.104172 |
| N                                                                                                                                | -1.061307 | 2.497475                                                                      | -1.417527 |
| H                                                                                                                                | -0.445584 | 3.190676                                                                      | -1.819297 |
| H                                                                                                                                | -2.762309 | 3.666209                                                                      | -1.688767 |
| N                                                                                                                                | -1.256938 | 0.355150                                                                      | -0.426956 |
| H                                                                                                                                | -4.267563 | 1.895303                                                                      | -0.670204 |
| H                                                                                                                                | -2.725956 | -1.103740                                                                     | 0.443874  |
| C                                                                                                                                | -2.537131 | 0.582889                                                                      | -0.338973 |
| O                                                                                                                                | -3.312062 | -0.369951                                                                     | 0.202433  |
| C                                                                                                                                | -3.201127 | 1.770351                                                                      | -0.772460 |
| C                                                                                                                                | -2.394796 | 2.717572                                                                      | -1.317592 |
| Cartesian Coordinates:                                                                                                           |           |                                                                               |           |
| C                                                                                                                                | -1.832882 | -2.327827                                                                     | -0.000031 |
| N                                                                                                                                | -0.423990 | -2.205089                                                                     | 0.000245  |
| C                                                                                                                                | 0.329619  | -1.031611                                                                     | 0.000276  |
| C                                                                                                                                | -0.479477 | 0.154618                                                                      | -0.000010 |
| C                                                                                                                                | -1.852393 | -0.021484                                                                     | -0.000270 |
| N                                                                                                                                | -2.547362 | -1.168508                                                                     | -0.000294 |
| H                                                                                                                                | -2.472968 | 0.879457                                                                      | -0.000488 |
| O                                                                                                                                | -2.315946 | -3.467366                                                                     | -0.000013 |
| O                                                                                                                                | 1.572401  | -1.083768                                                                     | 0.000534  |
| C                                                                                                                                | 0.184527  | 1.502481                                                                      | -0.000012 |
| H                                                                                                                                | 0.828588  | 1.642721                                                                      | 0.877078  |
| H                                                                                                                                | 0.828924  | 1.642555                                                                      | -0.876881 |
| H                                                                                                                                | -0.566593 | 2.299873                                                                      | -0.000232 |
| H                                                                                                                                | 0.095466  | -3.072404                                                                     | 0.000440  |



Table S1-7 Continued.

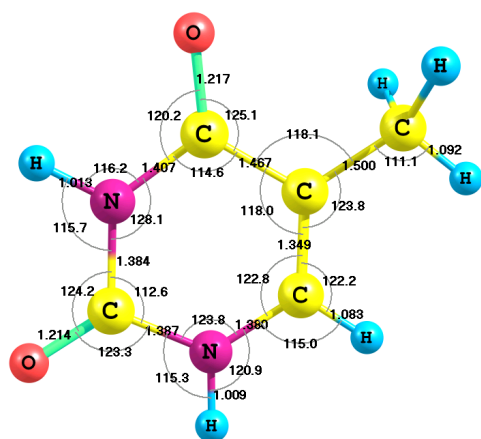

40

Energy: -453.03143 Hartree, Gibbs free energy: -453.06399 Hartree

Dipole: 4.9734. Symmetry:  $C_1$ , State:  $^1A$ .

Cartesian Coordinates:

|   |           |           |           |
|---|-----------|-----------|-----------|
| C | -1.795962 | -2.395693 | -0.000002 |
| N | -0.421360 | -2.231830 | 0.000220  |
| C | 0.310050  | -1.029583 | 0.000233  |
| C | -0.511769 | 0.186079  | -0.000024 |
| C | -1.853564 | 0.044682  | -0.000241 |
| N | -2.476340 | -1.186467 | -0.000234 |
| H | -2.523706 | 0.895880  | -0.000438 |
| O | -2.353677 | -3.473506 | 0.000004  |
| O | 1.526936  | -1.052214 | 0.000446  |
| C | 0.188171  | 1.512775  | -0.000011 |
| H | 0.832974  | 1.612338  | 0.877150  |
| H | 0.833605  | 1.612011  | -0.876741 |
| H | -0.529971 | 2.335159  | -0.000416 |
| H | -3.482525 | -1.258524 | -0.000397 |
| H | 0.122526  | -3.085984 | 0.000395  |

**Table S1a.** Energies and selected geometries of transition states, intermediates and product for reaction in Fig. 1a. Level of theory used CCSD(T)/6-311++G(d,p)//B3LYP/6-311++G(d,p). Relative energies in kJ mol<sup>-1</sup> with respect to [A+B] (see **Table S1-7**) (0 kJ mol<sup>-1</sup>).

|                                | 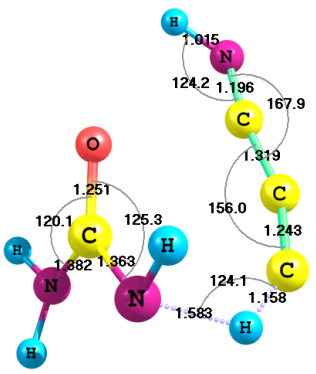 |  |  |  |  |
|--------------------------------|-----------------------------------------------------------------------------------|-----------------------------------------------------------------------------------|-------------------------------------------------------------------------------------|-------------------------------------------------------------------------------------|-------------------------------------------------------------------------------------|
|                                | TS 1/2                                                                            | 2                                                                                 | TS 2/3                                                                              | 3                                                                                   | TS 3/4                                                                              |
| Symmetry                       | C <sub>1</sub>                                                                    | C <sub>1</sub>                                                                    | C <sub>1</sub>                                                                      | C <sub>1</sub>                                                                      | C <sub>1</sub>                                                                      |
| ΔH (0 K)                       | 87                                                                                | -200                                                                              | 87                                                                                  | -391                                                                                | -223                                                                                |
| ΔG (298 K)                     | 134                                                                               | -154                                                                              | 138                                                                                 | -337                                                                                | -169                                                                                |
| Cartesian<br>coordinates       | C -1.221044 -0.434854 -0.229792                                                   | C -0.647147 1.562172 -0.587888                                                    | C 1.279105 0.575643 0.214887                                                        | C -0.046802 1.712432 0.000001                                                       | C 0.152178 1.735236 0.000020                                                        |
|                                | O -0.271197 -1.104123 -0.694175                                                   | O 0.512940 1.244055 -0.772524                                                     | O 2.412771 0.980255 0.296045                                                        | H -0.178836 2.786908 0.000000                                                       | H 0.362834 2.798216 0.000096                                                        |
|                                | N -1.827120 -0.820144 0.950817                                                    | N -1.185945 1.884081 0.611861                                                     | N 0.153891 1.398332 -0.158613                                                       | C 1.165447 1.128413 -0.000003                                                       | C -1.118982 1.249278 -0.000022                                                      |
|                                | H -1.651336 -1.764986 1.252515                                                    | H -0.574137 1.859529 1.410673                                                     | H -0.587117 0.542228 -0.969016                                                      | C 1.275152 -0.326107 0.000000                                                       | C -1.227796 -0.175884 -0.000078                                                     |
|                                | H -2.740243 -0.441674 1.147286                                                    | H -2.158580 2.143952 0.707124                                                     | H 0.415723 2.374986 -0.293474                                                       | N 2.325966 -1.056341 -0.000009                                                      | N -2.209300 -1.049932 0.000057                                                      |
|                                | N -1.664570 0.754312 -0.726377                                                    | N -1.528250 1.608733 -1.694642                                                    | N 0.852870 -0.727899 0.360351                                                       | H -2.114227 1.412501 -0.000003                                                      | H 2.172105 1.291801 0.000071                                                        |
|                                | H -0.932989 1.924175 0.049967                                                     | H -3.220184 1.859316 -2.815362                                                    | H -0.536502 -2.032306 -0.523630                                                     | N -1.207799 0.970960 0.000006                                                       | N 1.235375 0.915091 -0.000001                                                       |
|                                | H -1.219045 0.875107 -1.636078                                                    | H -1.050392 1.357226 -2.548232                                                    | H 1.585898 -1.422467 0.428725                                                       | H 2.066633 1.724129 -0.000004                                                       | H -1.978481 1.901611 0.000033                                                       |
|                                | C 1.856635 0.053825 0.125233                                                      | C -4.760522 2.651366 -0.222920                                                    | C -1.060373 1.083914 0.655452                                                       | C -1.224967 -0.423598 0.000001                                                      | C 1.166284 -0.516534 -0.000001                                                      |
|                                | C 1.185728 1.169859 0.335913                                                      | C -3.694428 2.291016 -0.816141                                                    | C -1.492043 -0.165125 0.030345                                                      | O -2.257885 -1.061451 -0.000014                                                     | O 2.189863 -1.168032 0.000046                                                       |
| C 0.191728 1.916016 0.325617   | C -2.860393 1.929309 -1.789004                                                    | C -0.456032 -1.056691 -0.050025                                                   | N 0.031611 -0.985786 0.000016                                                       | N -0.112488 -0.971430 -0.000125                                                     |                                                                                     |
| N 2.659841 -0.826468 0.026891  | N -5.812485 3.003775 0.315060                                                     | N -1.463291 1.904874 1.519536                                                     | H 3.166427 -0.483241 -0.000007                                                      | H -3.187865 -0.797394 0.000203                                                      |                                                                                     |
| H 2.457849 -1.742614 -0.361426 | H -5.803014 3.159381 1.320394                                                     | H -2.336137 1.576671 1.935200                                                     | H 0.061653 -1.997351 0.000049                                                       | H -1.112709 -1.858658 0.000208                                                      |                                                                                     |

**Table S1b.** Energies and selected geometries of transition states, intermediates and product for reaction in Fig.1b. Level of theory used CCSD(T)/6-311++G(d,p)//B3LYP/6-311++G(d,p). Relative energies in kJ mol<sup>-1</sup> with respect to [A+C] (see **Table S1-7**) (0 kJ mol<sup>-1</sup>).

|                       | TS 5/6                                                                                                                                                                                                                                                                                                                                                                                                               | 6                                                                                                                                                                                                                                                                                                                                                                                                                  | TS 6/7                                                                                                                                                                                                                                                                                                                                                                                                           | 7                                                                                                                                                                                                                                                                                                                                                                                                            | TS 7/8                                                                                                                                                                                                                                                                                                                                                                                                       |
|-----------------------|----------------------------------------------------------------------------------------------------------------------------------------------------------------------------------------------------------------------------------------------------------------------------------------------------------------------------------------------------------------------------------------------------------------------|--------------------------------------------------------------------------------------------------------------------------------------------------------------------------------------------------------------------------------------------------------------------------------------------------------------------------------------------------------------------------------------------------------------------|------------------------------------------------------------------------------------------------------------------------------------------------------------------------------------------------------------------------------------------------------------------------------------------------------------------------------------------------------------------------------------------------------------------|--------------------------------------------------------------------------------------------------------------------------------------------------------------------------------------------------------------------------------------------------------------------------------------------------------------------------------------------------------------------------------------------------------------|--------------------------------------------------------------------------------------------------------------------------------------------------------------------------------------------------------------------------------------------------------------------------------------------------------------------------------------------------------------------------------------------------------------|
| Symmetry              | C <sub>1</sub>                                                                                                                                                                                                                                                                                                                                                                                                       | C <sub>1</sub>                                                                                                                                                                                                                                                                                                                                                                                                     | C <sub>1</sub>                                                                                                                                                                                                                                                                                                                                                                                                   | C <sub>1</sub>                                                                                                                                                                                                                                                                                                                                                                                               | C <sub>1</sub>                                                                                                                                                                                                                                                                                                                                                                                               |
| ΔH (0 K)              | 106                                                                                                                                                                                                                                                                                                                                                                                                                  | -161                                                                                                                                                                                                                                                                                                                                                                                                               | 43                                                                                                                                                                                                                                                                                                                                                                                                               | -195                                                                                                                                                                                                                                                                                                                                                                                                         | 87                                                                                                                                                                                                                                                                                                                                                                                                           |
| ΔG (298 K)            | 151                                                                                                                                                                                                                                                                                                                                                                                                                  | -130                                                                                                                                                                                                                                                                                                                                                                                                               | 90                                                                                                                                                                                                                                                                                                                                                                                                               | -150                                                                                                                                                                                                                                                                                                                                                                                                         | 138                                                                                                                                                                                                                                                                                                                                                                                                          |
| Cartesian coordinates | C -0.002623 -0.108751 0.118516<br>O 0.280097 -0.194173 1.282035<br>N 1.385855 -0.087807 -0.821582<br>H 2.136252 -0.068302 -0.127784<br>H 1.372235 0.797140 -1.332163<br>N -1.064609 0.045173 -0.624545<br>H -1.140893 -0.452410 -1.935000<br>H -1.908200 0.025186 -0.057013<br>C 1.741445 -1.227907 -1.850202<br>C 0.685076 -1.310099 -2.770943<br>C -0.520235 -1.065508 -2.843848<br>O 2.770561 -1.800195 -1.664756 | C -0.671615 0.204387 -0.274726<br>O -1.615875 0.667570 0.221886<br>N 3.546439 -0.316182 -0.613918<br>H 4.261101 0.103293 -0.039070<br>H 2.571464 -0.121746 -0.426000<br>N 0.389474 -0.209512 -0.696506<br>H 1.329427 -2.698556 -3.772096<br>H 0.507983 -0.834974 -1.483888<br>C 3.945172 -1.129166 -1.625753<br>C 2.854486 -1.703997 -2.420897<br>C 2.027809 -2.221597 -3.126353<br>O 5.106003 -1.387895 -1.887175 | C -0.436004 0.730600 0.134083<br>O -0.252981 1.236037 1.199913<br>N 1.139808 0.548874 -0.691802<br>H 1.824510 0.659324 0.056524<br>H 1.185039 1.336873 -1.336944<br>N -1.316621 0.283126 -0.681939<br>H -1.751576 -0.432541 -2.908388<br>H -2.263604 0.307819 -0.316594<br>C 1.330449 -0.760830 -1.401421<br>C 0.406977 -0.873328 -2.481265<br>C -0.796934 -0.518319 -2.433252<br>O 2.122385 -1.538885 -0.941776 | C 1.852634 0.171959 -0.000167<br>O 3.053915 -0.012783 -0.000310<br>N 1.229094 1.366941 0.000311<br>H 1.808986 2.190166 -0.000191<br>H 0.214314 1.426926 0.000251<br>N 0.996039 -0.972444 0.000082<br>H -0.677193 -2.125360 0.000018<br>H 1.539410 -1.825022 0.000342<br>C -2.526115 0.082653 -0.000155<br>C -1.242704 -0.062118 0.000408<br>C -0.358341 -1.082321 0.000104<br>O -3.655701 0.376630 -0.000234 | C 1.155039 -0.342542 0.004837<br>O 2.162296 -0.994415 -0.130793<br>N 0.000684 -0.766287 0.733501<br>H -0.461124 0.407796 1.340586<br>H 0.102300 -1.706539 1.114623<br>N 0.971569 0.958458 -0.455184<br>H 0.091115 2.729009 0.256395<br>H 1.808299 1.411807 -0.800376<br>C -1.318507 -0.322390 -0.035774<br>C -1.304189 1.072873 0.338680<br>C -0.124504 1.689018 0.021543<br>O -2.011471 -1.101714 -0.598603 |

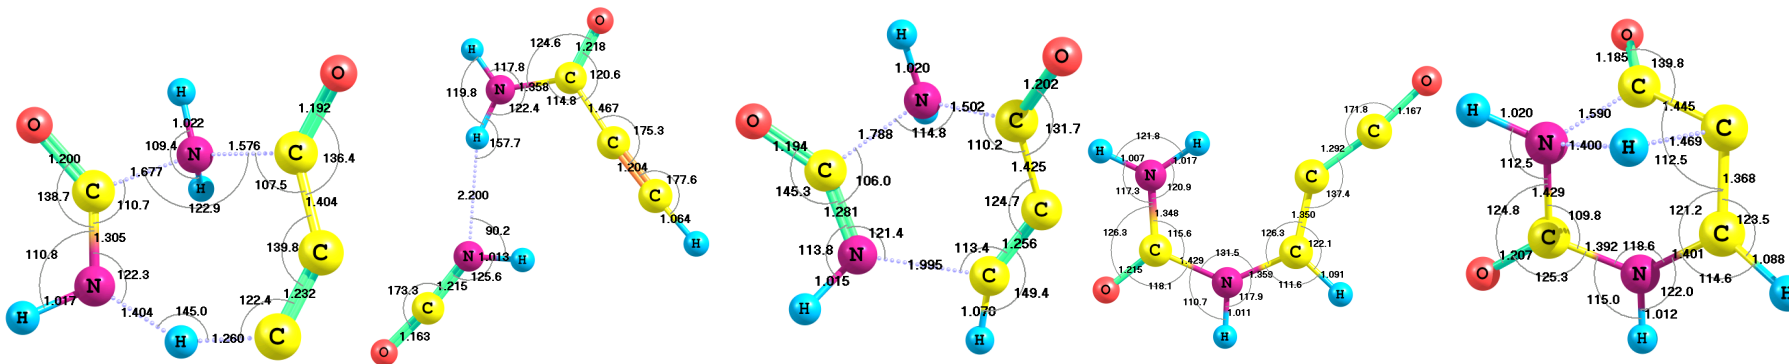

**Table S2a.** Energies and selected geometries of transition states, intermediates and product for reaction in Fig.2a. Level of theory used CCSD(T)/6-311++G(d,p)//B3LYP/6-311++G(d,p). Relative energies in kJ mol<sup>-1</sup> with respect to [A+C+E] (see Table S1-7) (0 kJ mol<sup>-1</sup>).

|                       | TS 9/10        |           |           | 10             |           |           | TS 10/11       |           |           | 11             |           |           | TS 11/12       |           |           |           |   |           |           |           |
|-----------------------|----------------|-----------|-----------|----------------|-----------|-----------|----------------|-----------|-----------|----------------|-----------|-----------|----------------|-----------|-----------|-----------|---|-----------|-----------|-----------|
| Symmetry              | C <sub>1</sub> |           |           |           |   |           |           |           |
| ΔH (0 K)              | 83             |           |           | -102           |           |           | -75            |           |           | -425           |           |           | -362           |           |           |           |   |           |           |           |
| ΔG (298 K)            | 159            |           |           | -13            |           |           | 20             |           |           | -335           |           |           | -267           |           |           |           |   |           |           |           |
|                       | C              | O         | N         | C              | O         | N         | C              | O         | N         | C              | O         | N         | C              | O         | N         |           |   |           |           |           |
|                       | -1.362755      | -0.654001 | -0.250063 | -0.759471      | -0.382395 | 0.150832  | 0.514927       | 1.376468  | 0.055788  | -2.065262      | -0.337006 | -0.427215 | 0.465277       | 1.396073  | 0.028517  |           |   |           |           |           |
| O                     | -0.789097      | -1.563063 | -0.879383 | -1.291069      | -1.456651 | 0.040566  | 0.192341       | 2.504770  | 0.345379  | -2.680087      | 0.054877  | -1.227592 | 0.292567       | 2.518812  | 0.453588  |           |   |           |           |           |
| N                     | -1.785879      | -0.840780 | 1.047066  | 0.681583       | -0.323527 | 0.623472  | -0.329925      | 0.233088  | 0.411102  | -1.047137      | 0.357833  | 0.115432  | -0.522761      | 0.479543  | -0.215929 |           |   |           |           |           |
| H                     | -1.763156      | -1.790727 | 1.400138  | 1.149541       | -1.234940 | 0.419357  | -1.282857      | 0.562808  | 0.567465  | -0.261448      | -0.232227 | 1.188640  | -1.701769      | 0.643391  | -0.067510 |           |   |           |           |           |
| H                     | -2.497901      | -0.222383 | 1.400074  | 0.666901       | -0.189659 | 1.638113  | 0.165245       | -0.553171 | 1.415950  | 0.734285       | 0.297644  | 1.812075  | -2.373737      | -0.900467 | -0.541591 |           |   |           |           |           |
| N                     | -1.586553      | 0.609704  | -0.735101 | -1.251463      | 0.846975  | -0.052463 | 1.647877       | 0.988352  | -0.592303 | -3.148456      | -2.119029 | -0.396496 | 1.770508       | 0.932540  | -0.256670 |           |   |           |           |           |
| H                     | -0.855910      | 1.824313  | 0.087841  | -1.163812      | 2.922465  | 0.260445  | 3.094251       | -0.543352 | -0.689578 | -2.386098      | -1.598442 | 0.009471  | 3.081978       | -0.549164 | -0.901621 |           |   |           |           |           |
| Cartesian coordinates | H              | -1.238165 | 0.630546  | -1.693422      | H         | -2.221555 | 0.878625       | -0.339105 | H         | 2.292313       | 1.733543  | -0.819222 | H              | -0.803468 | 1.350197  | -0.234764 | H | 2.508491  | 1.599901  | -0.086305 |
|                       | C              | 2.551311  | 0.636728  | 0.208899       | C         | 1.488827  | 0.885366       | 0.006617  | C         | -0.258007      | -0.843439 | -0.613657 | C              | -1.694871 | -2.256601 | 1.031478  | C | -0.305414 | -0.787468 | -0.679538 |
|                       | C              | 1.359836  | 1.163994  | 0.192850       | C         | 0.840064  | 2.129818       | 0.154276  | C         | 1.103403       | -1.379696 | -0.655102 | O              | -2.001707 | -3.371162 | 1.397842  | C | 1.045626  | -1.209596 | -0.947262 |
|                       | C              | 0.243779  | 1.710859  | 0.238970       | C         | -0.494802 | 2.077095       | 0.132694  | C         | 2.017896       | -0.395158 | -0.695654 | N              | -0.658464 | -1.520927 | 1.561958  | C | 2.038905  | -0.318044 | -0.723788 |
|                       | N              | 3.598579  | 0.059936  | 0.153304       | H         | 3.145073  | -2.835354      | 0.068821  | H         | 1.044198       | -1.890987 | 0.935121  | H              | 0.942076  | 1.226985  | 1.458803  | H | 1.253240  | -2.202652 | -1.317325 |
|                       | H              | 4.496403  | 0.309470  | 0.551755       | O         | 2.466995  | -2.237215      | -0.256444 | O         | 0.639841       | -1.540700 | 1.877964  | H              | -0.115808 | -1.968528 | 2.307228  | O | -2.949364 | 0.212816  | -0.193041 |
|                       | H              | -0.756001 | -3.093759 | 0.075822       | H         | 2.893737  | -1.386963      | -0.504534 | H         | 1.364026       | -1.371735 | 2.495304  | H              | 1.480938  | -0.905885 | 3.079605  | H | -3.489516 | 0.213291  | 0.602317  |
|                       | O              | -0.901663 | -3.690333 | 0.843286       | N         | 2.592403  | 0.489719       | -0.499626 | N         | -1.346725      | -1.153415 | -1.179512 | O              | 1.464939  | -1.803501 | 3.478356  | N | -1.383179 | -1.526104 | -0.843574 |
|                       | H              | -1.260458 | -4.505194 | 0.482043       | H         | 3.114740  | 1.300178       | -0.829701 | H         | -1.192107      | -1.946681 | -1.803680 | H              | 1.527962  | -1.689915 | 4.430602  | H | -1.264754 | -2.463062 | -1.198816 |

**Table S2b.** Energies and selected geometries of transition states, intermediates and product for reaction in Fig.2b. Level of theory used CCSD(T)/6-311++G(d,p)//B3LYP/6-311++G(d,p). Relative energies in kJ mol<sup>-1</sup> with respect to [A+C+E] (see **Table S1-7**) (0 kJ mol<sup>-1</sup>).

|                                | TS 9/10                         | 10                              | TS 10/11                        |
|--------------------------------|---------------------------------|---------------------------------|---------------------------------|
| Symmetry                       | C <sub>1</sub>                  | C <sub>1</sub>                  | C <sub>1</sub>                  |
| ΔH (0 K)                       | 82                              | -193                            | 17                              |
| ΔG (298 K)                     | 162                             | -126                            | 97                              |
| Cartesian<br>coordinates       | C 0.050115 -0.134905 0.036139   | C -0.145336 0.628730 0.096131   | C -0.365861 0.749606 0.057618   |
|                                | O 0.321536 -0.270600 1.213529   | O -0.286212 1.032259 1.181164   | O -0.185917 1.264218 1.137988   |
|                                | N 1.413141 -0.094734 -0.861274  | N 2.602852 0.101889 -2.946227   | N 1.167189 0.529390 -0.713245   |
|                                | H 2.163444 -0.087510 -0.167103  | H 3.099206 0.956616 -3.148526   | H 1.845330 0.641850 0.041272    |
|                                | H 1.408591 0.792254 -1.368705   | H 1.904017 0.098696 -2.210853   | H 1.242611 1.302826 -1.374027   |
|                                | N -1.019184 0.051437 -0.679571  | N 0.120734 0.259915 -1.026646   | N -1.278548 0.336054 -0.732524  |
|                                | H -1.115624 -0.436214 -2.021428 | H 1.117983 -4.175581 -2.932467  | H -1.690916 -0.468811 -2.984740 |
|                                | H -1.851934 0.013413 -0.086482  | H -0.495257 -0.248893 -1.672388 | H -2.210833 0.433074 -0.326598  |
|                                | C 1.776250 -1.238043 -1.911771  | C 2.887120 -0.982090 -3.709365  | C 1.365785 -0.800596 -1.403771  |
|                                | C 0.722090 -1.311838 -2.831958  | C 2.128477 -2.192351 -3.367806  | C 0.458935 -0.928503 -2.492437  |
|                                | C -0.478463 -1.044022 -2.900142 | C 1.579902 -3.239433 -3.139510  | C -0.736801 -0.566227 -2.513670 |
|                                | O 2.811342 -1.795647 -1.727408  | O 3.702016 -0.998339 -4.615173  | O 2.156254 -1.563781 -0.921750  |
| O -2.452697 -0.326226 1.939543 | O -1.143877 -1.327688 -3.003672 | O -3.072606 1.319618 1.490275   |                                 |
| H -1.506386 -0.346161 2.149807 | H -1.641393 -1.037263 -3.774865 | H -2.163331 1.468714 1.790887   |                                 |
| H -2.896389 0.048720 2.705238  | H -0.383777 -1.823801 -3.340532 | H -3.577836 1.081274 2.272712   |                                 |

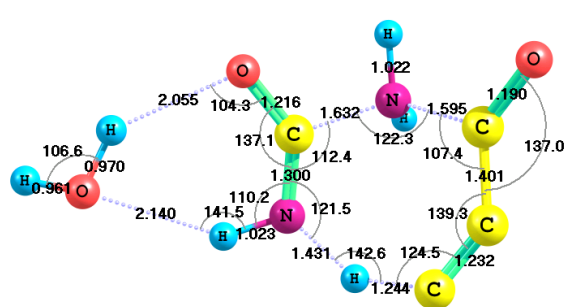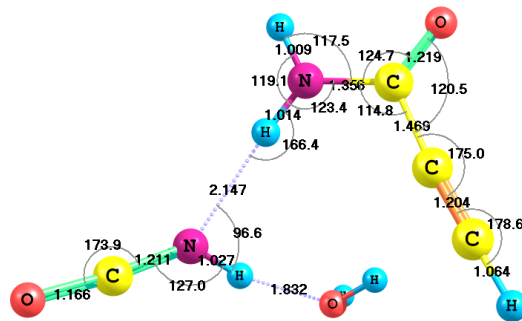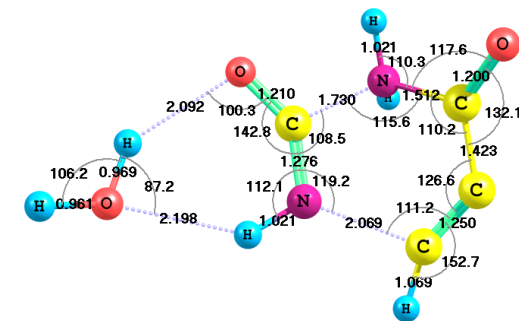

Table S2b Continued.

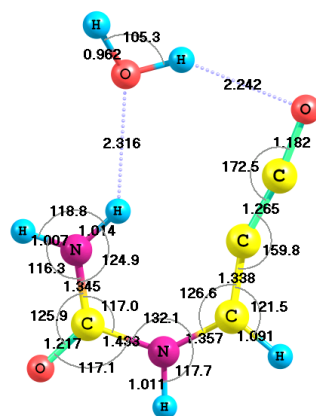

11

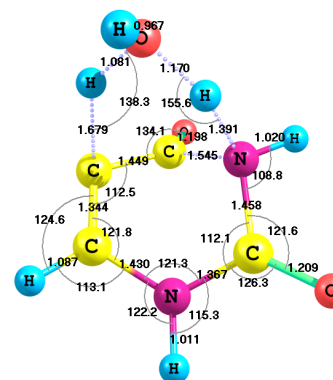

TS 11/12

|            |                |           |           |                |   |           |           |           |
|------------|----------------|-----------|-----------|----------------|---|-----------|-----------|-----------|
| Symmetry   | C <sub>1</sub> |           |           | C <sub>1</sub> |   |           |           |           |
| ΔH (0 K)   | -207           |           |           | -30            |   |           |           |           |
| ΔG (298 K) | -131           |           |           | 62             |   |           |           |           |
|            | C              | -1.283105 | 0.848554  | -0.029782      | C | 0.510239  | 1.383976  | 0.055912  |
|            | O              | -2.387944 | 1.358124  | -0.063912      | O | 0.194204  | 2.520420  | 0.321558  |
|            | N              | -0.110547 | 1.506808  | -0.026356      | N | -0.327089 | 0.251180  | 0.431951  |
|            | H              | 0.802246  | 1.065041  | -0.001571      | H | -1.274118 | 0.587093  | 0.606499  |
|            | H              | -0.161829 | 2.511308  | -0.080222      | H | 0.180066  | -0.568846 | 1.434518  |
|            | N              | -1.225040 | -0.582862 | 0.015302       | N | 1.642029  | 0.991801  | -0.602360 |
|            | H              | -0.516098 | -2.489636 | 0.044224       | H | 3.082608  | -0.546487 | -0.661021 |
| Cartesian  | H              | -2.159336 | -0.970102 | 0.025159       | H | 2.282236  | 1.736133  | -0.843204 |
| cooriantes | C              | 2.374867  | -1.279607 | -0.022917      | C | -0.266161 | -0.858012 | -0.642403 |
|            | C              | 1.118112  | -1.135466 | -0.006503      | C | 1.089702  | -1.368710 | -0.661965 |
|            | C              | -0.182321 | -1.450772 | 0.018466       | C | 2.008000  | -0.387838 | -0.693431 |
|            | O              | 3.556179  | -1.259032 | -0.041208      | H | 1.024047  | -1.895000 | 0.931248  |
|            | H              | 3.511165  | 2.393603  | 0.544795       | O | 0.637307  | -1.549653 | 1.879436  |
|            | O              | 3.010078  | 1.765216  | 0.016517       | H | 1.365249  | -1.395783 | 2.496770  |
|            | H              | 3.573405  | 0.982760  | -0.052546      | O | -1.283375 | -1.171151 | -1.191273 |

**Table S3a.** Energies and selected geometries of transition states, intermediates and product for reaction in Fig.3a. Level of theory used CCSD(T)/6-311++G(d,p)//B3LYP/6-311++G(d,p). Relative energies in kJ mol<sup>-1</sup> with respect to [A+B+E] (see **Table S1-7**) (0 kJ mol<sup>-1</sup>).

|                       | 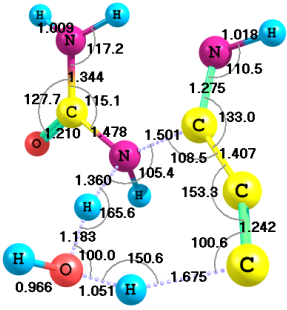                                                                                                                                                                                                                                                                                                                                                                                                                                                                   |                                                                                                                                                                                                                                                                                                                                                                                                                                                                    |                                                                                                                                                                                                                                                                                                                                                                                                                                                                     |                                                                                                                                                                                                                                                                                                                                                                                                                                                                     |
|-----------------------|-----------------------------------------------------------------------------------------------------------------------------------------------------------------------------------------------------------------------------------------------------------------------------------------------------------------------------------------------------------------------------------------------------------------------------------------------------------------------------------------------------------------------------------------------------|------------------------------------------------------------------------------------------------------------------------------------------------------------------------------------------------------------------------------------------------------------------------------------------------------------------------------------------------------------------------------------------------------------------------------------------------------------------------------------------------------------------------------------------------------|--------------------------------------------------------------------------------------------------------------------------------------------------------------------------------------------------------------------------------------------------------------------------------------------------------------------------------------------------------------------------------------------------------------------------------------------------------------------------------------------------------------------------------------------------------|--------------------------------------------------------------------------------------------------------------------------------------------------------------------------------------------------------------------------------------------------------------------------------------------------------------------------------------------------------------------------------------------------------------------------------------------------------------------------------------------------------------------------------------------------------|
|                       | TS 17/18                                                                                                                                                                                                                                                                                                                                                                                                                                                                                                                                            | 18                                                                                                                                                                                                                                                                                                                                                                                                                                                                                                                                                   | TS 18/19                                                                                                                                                                                                                                                                                                                                                                                                                                                                                                                                               | 19                                                                                                                                                                                                                                                                                                                                                                                                                                                                                                                                                     |
| Symmetry              | C <sub>1</sub>                                                                                                                                                                                                                                                                                                                                                                                                                                                                                                                                      | C <sub>1</sub>                                                                                                                                                                                                                                                                                                                                                                                                                                                                                                                                       | C <sub>1</sub>                                                                                                                                                                                                                                                                                                                                                                                                                                                                                                                                         | C <sub>1</sub>                                                                                                                                                                                                                                                                                                                                                                                                                                                                                                                                         |
| ΔH (0 K)              | -16                                                                                                                                                                                                                                                                                                                                                                                                                                                                                                                                                 | -244                                                                                                                                                                                                                                                                                                                                                                                                                                                                                                                                                 | -110                                                                                                                                                                                                                                                                                                                                                                                                                                                                                                                                                   | -110                                                                                                                                                                                                                                                                                                                                                                                                                                                                                                                                                   |
| ΔG (298 K)            | 73                                                                                                                                                                                                                                                                                                                                                                                                                                                                                                                                                  | -163                                                                                                                                                                                                                                                                                                                                                                                                                                                                                                                                                 | -25                                                                                                                                                                                                                                                                                                                                                                                                                                                                                                                                                    | -26                                                                                                                                                                                                                                                                                                                                                                                                                                                                                                                                                    |
| Cartesian coordinates | C -1.641522 -0.329311 -0.136158<br>O -2.197920 -1.284049 -0.628067<br>N -2.161073 0.584387 0.700690<br>H -3.157743 0.531924 0.848569<br>H -1.666968 1.475691 0.783692<br>N -0.193058 -0.188855 -0.395902<br>H 2.207445 -1.425396 0.320727<br>H -0.053373 -0.511945 -1.354971<br>C 0.617066 1.059036 -0.194533<br>C 1.980155 0.732247 -0.316484<br>C 2.964163 -0.005202 -0.142993<br>H 1.319753 -2.186066 1.474060<br>O 1.334137 -1.970057 0.532326<br>H 0.514784 -1.180503 0.208204<br>N 0.005434 2.132428 0.119692<br>H 0.668074 2.892792 0.255293 | C 1.663753 0.189183 0.106307<br>O 2.864605 0.019425 0.212716<br>N 1.017901 1.349163 0.413408<br>H 0.170298 1.624738 -0.073844<br>H 1.637288 2.095656 0.689664<br>N 0.862838 -0.868710 -0.374307<br>H -2.667530 0.455665 2.272504<br>H 1.409058 -1.596207 -0.818166<br>C -0.465924 -1.223323 -0.189819<br>C -1.270332 -0.494797 0.761610<br>C -2.027432 0.002243 1.554128<br>H -2.187473 1.547201 -0.769353<br>O -1.494564 2.162846 -1.033511<br>H -1.617528 2.316056 -1.975908<br>N -0.913566 -2.238015 -0.836134<br>H -1.875036 -2.438182 -0.572651 | C 1.256142 -0.664453 -0.156771<br>O 2.342379 -1.138621 -0.394054<br>N 1.147584 0.629831 0.533877<br>H 0.902999 1.372526 -0.144060<br>H 2.052272 0.828895 0.960285<br>N 0.050688 -1.179270 -0.480419<br>H 0.113522 1.287089 2.428908<br>H 0.065768 -2.014032 -1.054231<br>C -1.237098 -0.774198 0.028951<br>C -1.251743 -0.000778 1.261669<br>C -0.191655 0.655964 1.609563<br>H -1.070895 2.434336 -0.649122<br>O -0.200876 2.546988 -1.052317<br>H -0.351704 2.599996 -2.001899<br>N -2.228675 -1.185387 -0.661877<br>H -3.085047 -0.931173 -0.170459 | C 0.548800 -0.856157 -0.405780<br>O 1.530402 -1.389503 -0.862481<br>N 0.683198 0.467377 0.267064<br>H 0.422331 1.209793 -0.410762<br>H 1.667400 0.571015 0.518500<br>N -0.726679 -1.273367 -0.440218<br>H 0.160552 1.268783 2.245990<br>H -0.913374 -2.112616 -0.976735<br>C -1.839655 -0.685957 0.277079<br>C -1.528544 0.119101 1.449879<br>C -0.334039 0.656211 1.504249<br>H -1.474512 2.456875 -0.598560<br>O -0.692280 2.448726 -1.164922<br>H -1.017605 2.471828 -2.070988<br>N -2.982850 -0.989022 -0.204499<br>H -3.696022 -0.612016 0.419546 |

Table S3a Continued.

|                       | 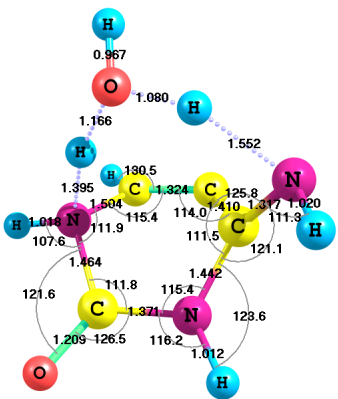                                                                                                                                                                                                                                                                                                                                                                                                                                                              |                                                                                                                                                                                                                                                                                                                                                                                                                                                                |                                                                                                                                                                                                                                                                                                                                                                                                                                                              |                                                                                                                                                                                                                                                                                                                                                                                                                                                                   |
|-----------------------|------------------------------------------------------------------------------------------------------------------------------------------------------------------------------------------------------------------------------------------------------------------------------------------------------------------------------------------------------------------------------------------------------------------------------------------------------------------------------------------------------------------------------------------------|--------------------------------------------------------------------------------------------------------------------------------------------------------------------------------------------------------------------------------------------------------------------------------------------------------------------------------------------------------------------------------------------------------------------------------------------------------------------------------------------------------------------------------------------------|-------------------------------------------------------------------------------------------------------------------------------------------------------------------------------------------------------------------------------------------------------------------------------------------------------------------------------------------------------------------------------------------------------------------------------------------------------------------------------------------------------------------------------------------------|------------------------------------------------------------------------------------------------------------------------------------------------------------------------------------------------------------------------------------------------------------------------------------------------------------------------------------------------------------------------------------------------------------------------------------------------------------------------------------------------------------------------------------------------------|
|                       | TS 19/20                                                                                                                                                                                                                                                                                                                                                                                                                                                                                                                                       | 20                                                                                                                                                                                                                                                                                                                                                                                                                                                                                                                                               | TS 20/21                                                                                                                                                                                                                                                                                                                                                                                                                                                                                                                                        | 21                                                                                                                                                                                                                                                                                                                                                                                                                                                                                                                                                   |
| Symmetry              | C <sub>1</sub>                                                                                                                                                                                                                                                                                                                                                                                                                                                                                                                                 | C <sub>1</sub>                                                                                                                                                                                                                                                                                                                                                                                                                                                                                                                                   | C <sub>1</sub>                                                                                                                                                                                                                                                                                                                                                                                                                                                                                                                                  | C <sub>1</sub>                                                                                                                                                                                                                                                                                                                                                                                                                                                                                                                                       |
| ΔH (0 K)              | -38                                                                                                                                                                                                                                                                                                                                                                                                                                                                                                                                            | -267                                                                                                                                                                                                                                                                                                                                                                                                                                                                                                                                             | -253                                                                                                                                                                                                                                                                                                                                                                                                                                                                                                                                            | -412                                                                                                                                                                                                                                                                                                                                                                                                                                                                                                                                                 |
| ΔG (298 K)            | 58                                                                                                                                                                                                                                                                                                                                                                                                                                                                                                                                             | -177                                                                                                                                                                                                                                                                                                                                                                                                                                                                                                                                             | -159                                                                                                                                                                                                                                                                                                                                                                                                                                                                                                                                            | -326                                                                                                                                                                                                                                                                                                                                                                                                                                                                                                                                                 |
| Cartesian coordinates | C -0.680081 -0.814654 0.191303<br>O -1.664759 -1.376448 0.610320<br>N -0.710986 0.593586 -0.206974<br>H 0.010875 1.313892 0.744550<br>H -1.687243 0.865468 -0.302039<br>N 0.580981 -1.343673 0.091753<br>H -0.316964 1.403168 -2.195224<br>H 0.726805 -2.239246 0.540995<br>C 1.635574 -0.389170 -0.147136<br>C 1.396096 0.362273 -1.316410<br>C 0.171646 0.859381 -1.395199<br>H 1.057309 2.673250 1.143308<br>O 0.845521 1.770970 1.417663<br>H 1.706332 1.144709 1.234939<br>N 2.516766 -0.100556 0.787856<br>H 2.458238 -0.755735 1.567163 | C -0.824768 -0.047759 0.199753<br>O -1.535507 -1.029429 0.294842<br>N 0.560046 -0.142136 0.028333<br>H 2.519767 3.280939 -0.147222<br>H 0.894047 -1.098944 -0.004978<br>N -1.255011 1.253317 0.243850<br>H -0.938768 3.296871 0.190401<br>H -2.251333 1.371693 0.368934<br>C 1.409823 0.934951 -0.082561<br>C 0.943857 2.279677 -0.038541<br>C -0.401505 2.354271 0.128660<br>H 3.717504 4.005621 -0.885575<br>O 3.524179 3.352094 -0.207192<br>H 3.339940 1.479779 -0.305060<br>N 2.712115 0.670766 -0.238151<br>H 3.086758 -0.264646 -0.237320 | C -1.209212 -0.652544 -0.001120<br>O -2.237140 -1.297642 -0.013440<br>N 0.052910 -1.260089 -0.000664<br>H 2.612500 1.177983 0.011054<br>H 0.014358 -2.272571 -0.013523<br>N -1.137546 0.719620 0.014291<br>H -0.081295 2.509895 0.032591<br>H -2.029759 1.194082 0.010730<br>C 1.247654 -0.584829 0.009180<br>C 1.276829 0.848249 0.026402<br>C 0.059928 1.434239 0.025996<br>H 4.365501 1.333819 0.574777<br>O 3.816169 0.889090 -0.077296<br>H 3.251961 -0.599200 0.011233<br>N 2.393664 -1.245476 0.003561<br>H 2.441122 -2.252481 -0.030754 | C -1.960539 -0.216934 -0.018997<br>O -3.079900 -0.685617 -0.033581<br>N -0.811687 -0.994656 0.017830<br>H 1.667535 1.304163 0.024745<br>H -0.995867 -1.989114 0.030760<br>N -1.702835 1.143729 -0.036993<br>H -0.372958 2.755697 -0.042423<br>H -2.517604 1.737398 -0.066234<br>C 0.522437 -0.551280 0.038747<br>C 0.667279 0.895278 0.015110<br>C -0.426272 1.675212 -0.021706<br>H 4.617990 0.021216 0.490595<br>O 3.894632 0.289531 -0.082082<br>H 3.226966 -0.424425 -0.020571<br>N 1.540732 -1.334387 0.074618<br>H 1.292801 -2.322332 0.077630 |



**Table S3b.** Energies and selected geometries of transition states, intermediates and product for reaction in Fig.3b. Level of theory used CCSD(T)/6-311++G(d,p)//B3LYP/6-311++G(d,p). Relative energies in kJ mol<sup>-1</sup> with respect to [A+C+E] (see Table S1-7) (0 kJ mol<sup>-1</sup>).

|                       | <br>TS 22/23   |           |           | <br>23         |           |           | <br>TS 23/24   |           |           | <br>24         |           |           |
|-----------------------|----------------|-----------|-----------|----------------|-----------|-----------|----------------|-----------|-----------|----------------|-----------|-----------|
| Symmetry              | C <sub>1</sub> |           |           |
| ΔH (0 K)              | 31             |           |           | -210           |           |           | -62            |           |           | -66            |           |           |
| ΔG (298 K)            | 116            |           |           | -133           |           |           | 20             |           |           | 19             |           |           |
| Cartesian coordinates | C              | O         | N         | C              | O         | N         | C              | O         | N         | C              | O         | N         |
|                       | -0.041955      | 0.404052  | -0.033567 | 1.641115       | 0.230911  | 0.114645  | 1.396060       | -0.261424 | -0.209698 | -1.116430      | -0.800227 | 0.163104  |
|                       | 0.973314       | -0.098592 | -0.455142 | 2.837636       | 0.058614  | 0.235661  | 2.555936       | -0.358042 | -0.526546 | -2.111504      | -1.336427 | 0.570883  |
|                       | -0.271339      | 0.843809  | 1.220309  | 0.977819       | 1.368858  | 0.433356  | 0.916021       | 0.941432  | 0.496339  | -1.222910      | 0.603274  | -0.408964 |
|                       | 0.438189       | 0.619597  | 1.901770  | 0.092021       | 1.614015  | 0.001356  | 0.376804       | 1.540032  | -0.154797 | -0.899057      | 1.246374  | 0.344332  |
|                       | -1.233590      | 0.955176  | 1.523628  | 1.559843       | 2.120868  | 0.767692  | 1.731151       | 1.443971  | 0.846403  | -2.212452      | 0.764884  | -0.601358 |
|                       | -1.126244      | 0.675700  | -0.989755 | 0.846947       | -0.823470 | -0.425506 | 0.397088       | -1.141912 | -0.453214 | 0.160876       | -1.217506 | 0.164937  |
|                       | -1.809229      | 2.499520  | -2.996680 | -2.685298      | 0.330403  | 2.298315  | -0.057155      | 1.143167  | 2.529295  | -0.804094      | 1.268944  | -2.454546 |
|                       | -1.070231      | -0.058199 | -1.698369 | 1.407151       | -1.508237 | -0.919691 | 0.616696       | -1.907593 | -1.079549 | 0.375982       | -2.036581 | 0.721849  |
|                       | -2.602657      | 0.854357  | -0.588258 | -0.450514      | -1.249557 | -0.212971 | -0.970549      | -1.062545 | 0.065346  | 1.252469       | -0.332245 | -0.301380 |
|                       | -2.927112      | 0.716334  | 0.566800  | -0.893796      | -2.225114 | -0.791097 | -1.085573      | -0.430552 | 1.364153  | 0.942272       | 0.309023  | -1.538053 |
|                       | -3.302527      | 1.265361  | -1.729924 | -1.270021      | -0.540186 | 0.757498  | -0.254773      | 0.505558  | 1.682725  | -0.274978      | 0.791332  | -1.640345 |
|                       | -3.372474      | 1.995378  | -2.734071 | -2.031364      | -0.084971 | 1.569233  | -1.898967      | 1.868384  | -0.588147 | 0.531974       | 2.710355  | 1.895582  |
|                       | -0.569420      | 3.405117  | -2.410343 | -2.259822      | 1.515208  | -0.877172 | -1.108911      | 2.223167  | -1.014927 | 0.330202       | 1.810333  | 1.621970  |
|                       | -0.803687      | 2.509823  | -2.689172 | -1.523903      | 2.116727  | -1.036191 | -1.296597      | 2.223007  | -1.959510 | 1.184654       | 1.363764  | 1.503252  |
|                       | -0.844490      | 1.721599  | -1.805229 | -1.582045      | 2.371015  | -1.962865 | -1.843860      | -1.541852 | -0.622367 | 2.228313       | -0.230699 | 0.423600  |

Table S3b. Continued.

|                                |                                 |                                |
|--------------------------------|---------------------------------|--------------------------------|
|                                |                                 |                                |
| <b>TS 24/25</b>                | <b>25</b>                       | <b>TS 25/16</b>                |
| C <sub>1</sub>                 | C <sub>1</sub>                  | C <sub>1</sub>                 |
| -13                            | -202                            | -203                           |
| 80                             | -113                            | -111                           |
| C -0.677046 -0.773695 0.190680 | C -1.880755 -0.219269 0.000817  | C -1.184104 -0.671031 0.010922 |
| O -1.640108 -1.321263 0.671740 | O -2.996097 -0.695566 -0.001569 | O -2.193381 -1.342500 0.011953 |
| N -0.734436 0.602110 -0.285802 | N -0.718989 -0.992474 0.004857  | N 0.099336 -1.222338 0.007076  |
| H 0.028593 1.310282 0.767827   | H 2.659775 0.853571 -0.044157   | H 2.755532 1.199408 -0.025340  |
| H -1.710785 0.865281 -0.391807 | H -0.857999 -1.997495 0.001093  | H 0.145319 -2.235596 0.000225  |
| N 0.600060 -1.281216 0.120285  | N -1.596326 1.130756 0.000108   | N -1.156393 0.709221 0.013808  |
| H -0.341034 1.385069 -2.274781 | H -0.302327 2.737909 -0.001338  | H -0.177536 2.532814 0.010524  |
| H 0.794383 -2.076586 0.717409  | H -2.406659 1.736309 -0.005342  | H -2.065352 1.152145 0.013601  |
| C 1.633081 -0.335268 -0.209872 | C 0.547468 -0.480956 0.005874   | C 1.256177 -0.496166 0.002897  |
| C 1.376012 0.361150 -1.390333  | C 0.829297 0.902095 0.006315    | C 1.256150 0.927029 0.006758   |
| C 0.146727 0.854072 -1.464885  | C -0.310008 1.651127 0.001760   | C 0.008679 1.463105 0.010391   |
| H 1.100247 2.549501 1.263222   | O 1.473023 -1.411311 0.006791   | O 2.347359 -1.191080 -0.004373 |
| O 0.828046 1.645025 1.471657   | H 4.057019 0.469528 0.633277    | H 4.337360 1.057106 0.647315   |
| H 1.653040 0.996966 1.295185   | O 3.468657 0.240569 -0.093289   | O 3.797986 0.770494 -0.097043  |
| O 2.492002 -0.071283 0.677702  | H 2.376723 -0.955324 -0.002353  | H 3.162765 -0.472459 -0.016607 |

**Table S4.** Energies and Selected Geometries of Transition States, Intermediates and Product for Reaction in Fig.4. Level of theory used CCSD(T)/6-311++G(d,p)//B3LYP/6-311++G(d,p). Relative energies in kJ mol<sup>-1</sup> with respect to [A+D+E] (see Table S1-7) (0 kJ mol<sup>-1</sup>).

|                       | 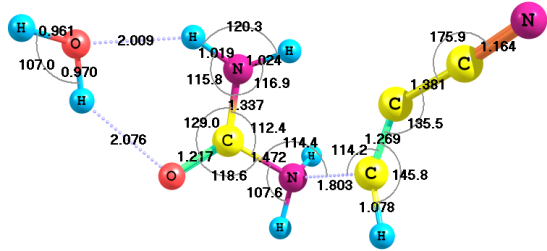<br>TS 26/27                                                                                                                                                                                                                                                                                                                                                                                                                                                                   | <br>27                                                                                                                                                                                                                                                                                                                                                                                                                                                           | <br>TS 27/28                                                                                                                                                                                                                                                                                                                                                                                                                                                                 |
|-----------------------|-----------------------------------------------------------------------------------------------------------------------------------------------------------------------------------------------------------------------------------------------------------------------------------------------------------------------------------------------------------------------------------------------------------------------------------------------------------------------------------------------------------------------------------------------------------------|-----------------------------------------------------------------------------------------------------------------------------------------------------------------------------------------------------------------------------------------------------------------------------------------------------------------------------------------------------------------------------------------------------------------------------------------------------------------------------------------------------------------------------------------------------|-----------------------------------------------------------------------------------------------------------------------------------------------------------------------------------------------------------------------------------------------------------------------------------------------------------------------------------------------------------------------------------------------------------------------------------------------------------------------------------------------------------------------------------------------------------------|
| Symmetry              | C <sub>1</sub>                                                                                                                                                                                                                                                                                                                                                                                                                                                                                                                                                  | C <sub>1</sub>                                                                                                                                                                                                                                                                                                                                                                                                                                                                                                                                      | C <sub>1</sub>                                                                                                                                                                                                                                                                                                                                                                                                                                                                                                                                                  |
| ΔH (0 K)              | 99                                                                                                                                                                                                                                                                                                                                                                                                                                                                                                                                                              | -132                                                                                                                                                                                                                                                                                                                                                                                                                                                                                                                                                | 46                                                                                                                                                                                                                                                                                                                                                                                                                                                                                                                                                              |
| ΔG (298 K)            | 177                                                                                                                                                                                                                                                                                                                                                                                                                                                                                                                                                             | -65                                                                                                                                                                                                                                                                                                                                                                                                                                                                                                                                                 | 121                                                                                                                                                                                                                                                                                                                                                                                                                                                                                                                                                             |
| Cartesian coordinates | C -1.877397 -0.451087 0.156931<br>H -2.755248 0.121680 -0.093665<br>C -0.608354 -0.484227 0.150654<br>C 0.398168 0.370398 -0.254291<br>N 1.301054 1.032804 -0.570645<br>H -3.666541 -1.818039 0.896653<br>N -2.652259 -1.916381 0.867545<br>H -2.277816 -1.918915 1.814268<br>C -2.347758 -3.170620 0.158964<br>O -3.266275 -3.801384 -0.330045<br>N -1.040949 -3.451273 0.157202<br>H -0.758208 -4.245050 -0.416202<br>H -0.399465 -2.667635 0.305940<br>H -1.509250 -6.212213 -2.299916<br>O -1.535002 -5.791319 -1.436088<br>H -2.421180 -5.410607 -1.332519 | C 1.482333 1.267519 0.414344<br>H 2.305095 1.628342 1.023673<br>C 1.710805 0.265271 -0.479373<br>C 2.995754 -0.305767 -0.640919<br>N 4.034073 -0.803268 -0.776062<br>H 0.206380 2.522603 1.394846<br>N 0.303107 1.898326 0.612244<br>H -0.555574 1.512111 0.234013<br>C -3.215742 -0.107682 -0.368269<br>O -4.305784 -0.035638 -0.776263<br>N -2.069064 -0.058105 0.019579<br>H -1.531034 -0.814866 0.459906<br>H 0.928078 -0.072527 -1.150274<br>H -0.008036 -2.741619 1.222090<br>O -0.161024 -1.791780 1.196041<br>H 0.673840 -1.389421 0.912498 | C -1.615008 -0.612525 -0.057750<br>H -2.042465 0.380165 0.030658<br>C -0.440801 -0.811469 -0.670149<br>C 0.309474 0.271015 -1.205152<br>N 0.934975 1.136825 -1.647323<br>H -3.363993 -1.470444 0.510729<br>N -2.362194 -1.650298 0.548629<br>H -2.037555 -2.181455 1.615972<br>C -2.032722 -3.220177 0.222658<br>O -2.070128 -3.670948 -0.894971<br>N -1.784275 -3.539478 1.465809<br>H -1.542931 -4.510538 1.657107<br>H -0.025014 -1.805435 -0.789717<br>H -1.632476 -5.656008 -0.522573<br>O -1.444807 -6.286277 0.189571<br>H -0.957401 -7.010616 -0.212374 |

Table S4 Continued.

|                       | 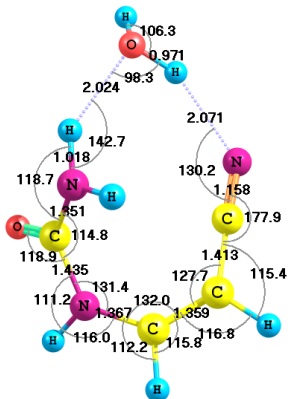                                                                                                                                                                                                                                                                                                                                                                                                                                                                     |                                                                                                                                                                                                                                                                                                                                                                                                                                                                      |
|-----------------------|--------------------------------------------------------------------------------------------------------------------------------------------------------------------------------------------------------------------------------------------------------------------------------------------------------------------------------------------------------------------------------------------------------------------------------------------------------------------------------------------------------------------------------------------------------|---------------------------------------------------------------------------------------------------------------------------------------------------------------------------------------------------------------------------------------------------------------------------------------------------------------------------------------------------------------------------------------------------------------------------------------------------------------------------------------------------------------------------------------------------------|
|                       | <b>28</b>                                                                                                                                                                                                                                                                                                                                                                                                                                                                                                                                              | <b>TS 28/3</b>                                                                                                                                                                                                                                                                                                                                                                                                                                                                                                                                          |
| Symmetry              | $C_1$                                                                                                                                                                                                                                                                                                                                                                                                                                                                                                                                                  | $C_1$                                                                                                                                                                                                                                                                                                                                                                                                                                                                                                                                                   |
| $\Delta H$ (0 K)      | -156                                                                                                                                                                                                                                                                                                                                                                                                                                                                                                                                                   | 30                                                                                                                                                                                                                                                                                                                                                                                                                                                                                                                                                      |
| $\Delta G$ (298 K)    | -77                                                                                                                                                                                                                                                                                                                                                                                                                                                                                                                                                    | 116                                                                                                                                                                                                                                                                                                                                                                                                                                                                                                                                                     |
| Cartesian coordinates | C -1.719528 -0.855035 -0.312514<br>H -2.207137 -0.698418 -1.269610<br>C -0.896678 0.143971 0.102695<br>C -0.248616 0.265745 1.352478<br>N 0.287799 0.406330 2.369511<br>H -2.956935 -2.436306 -0.048980<br>N -2.080222 -2.041464 0.262702<br>H -0.759163 0.977255 -0.574772<br>C -1.594574 -2.715447 1.433358<br>O -2.384935 -3.296524 2.146403<br>N -0.251001 -2.706912 1.575064<br>H 0.143607 -2.845081 2.502847<br>H 0.327416 -2.204844 0.921627<br>H 1.022401 -1.000467 3.700509<br>O 1.209393 -1.919415 3.953428<br>H 1.150064 -1.952386 4.912469 | C -1.824126 -0.903976 -0.334829<br>H -2.409006 -0.615403 -1.202383<br>C -0.937501 0.028376 0.147645<br>C -0.157889 -0.089612 1.303204<br>N 0.537509 0.258031 2.195009<br>H -2.937427 -2.581519 -0.169192<br>N -2.084410 -2.131960 0.136832<br>H -0.877128 0.990209 -0.348081<br>C -1.540881 -2.630247 1.424687<br>O -2.350602 -3.095942 2.204116<br>N -0.229319 -2.422916 1.573740<br>H 0.669006 -2.218642 2.975175<br>H 0.244699 -2.397735 0.674136<br>H 0.956303 -0.363859 2.977309<br>O 1.234472 -1.718908 3.656215<br>H 0.872830 -1.908973 4.528049 |

**Table S5.** Energies and selected geometries of transition states, intermediates and product for reaction in Fig.5. Level of theory used CCSD(T)/6-311++G(d,p)//B3LYP/6-311++G(d,p). Relative energies in kJ mol<sup>-1</sup> with respect to [A+E+I] (see Table S1-7) (0 kJ mol<sup>-1</sup>).

|                       | 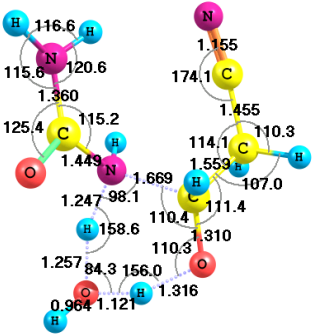<br>TS 29/30 | <br>30 | <br>TS 30/31 | <br>31 |                            |                               |              |
|-----------------------|-----------------------------------------------------------------------------------------------|------------------------------------------------------------------------------------------|-------------------------------------------------------------------------------------------------|-------------------------------------------------------------------------------------------|----------------------------|-------------------------------|--------------|
| Symmetry              | C <sub>1</sub>                                                                                | C <sub>1</sub>                                                                           | C <sub>1</sub>                                                                                  | C <sub>1</sub>                                                                            |                            |                               |              |
| ΔH (0 K)              | 51                                                                                            | -48                                                                                      | 167                                                                                             | -15 [26+E]                                                                                |                            |                               |              |
| ΔG (298 K)            | 145                                                                                           | 35                                                                                       | 256                                                                                             | 33 [26+E]                                                                                 |                            |                               |              |
| Cartesian coordinates | C                                                                                             | 0.225274 -0.732570 0.304462                                                              | C                                                                                               | 1.271859 -1.825157 0.069872                                                               | C                          | 2.067298 -1.349397 -0.129454  | See Table S4 |
|                       | N                                                                                             | 1.084072 -1.469122 0.535428                                                              | N                                                                                               | 1.434897 -2.924827 -0.237136                                                              | N                          | 2.942377 -2.027910 -0.469433  |              |
|                       | H                                                                                             | -3.567107 -1.911368 0.911907                                                             | H                                                                                               | -0.641471 1.647699 0.709068                                                               | H                          | -0.462084 2.307783 -0.306670  |              |
|                       | N                                                                                             | -2.348543 -2.013970 0.666060                                                             | N                                                                                               | -1.002267 -0.232384 -1.038292                                                             | N                          | -1.156840 -0.086059 -0.902105 |              |
|                       | H                                                                                             | -1.784252 -1.871318 1.501238                                                             | H                                                                                               | -1.334275 0.234427 -1.873551                                                              | H                          | -1.555856 0.396347 -1.698720  |              |
|                       | C                                                                                             | -2.123684 -3.310984 0.059829                                                             | C                                                                                               | -2.118277 -0.635726 -0.288521                                                             | C                          | -2.178416 -0.305355 0.063050  |              |
|                       | O                                                                                             | -2.948787 -3.761867 -0.703008                                                            | O                                                                                               | -3.247895 -0.364962 -0.645945                                                             | O                          | -3.236283 0.277875 -0.048135  |              |
|                       | N                                                                                             | -0.984395 -3.942531 0.450456                                                             | N                                                                                               | -1.843044 -1.350067 0.866828                                                              | N                          | -1.897751 -1.202973 1.051942  |              |
|                       | H                                                                                             | -0.787345 -4.815158 -0.017364                                                            | H                                                                                               | -2.686327 -1.713697 1.290037                                                              | H                          | -2.682230 -1.438460 1.641367  |              |
|                       | H                                                                                             | -0.185499 -3.410844 0.772700                                                             | H                                                                                               | -1.097796 -2.032624 0.813474                                                              | H                          | -1.212510 -1.925608 0.894819  |              |
|                       | C                                                                                             | -0.951828 0.087511 0.059122                                                              | C                                                                                               | 1.028344 -0.447985 0.483340                                                               | C                          | 1.022219 -0.475546 0.312798   |              |
|                       | H                                                                                             | -0.749097 0.816429 -0.728962                                                             | H                                                                                               | 1.982447 0.066869 0.623803                                                                | H                          | 1.694613 0.638270 0.841601    |              |
|                       | H                                                                                             | -1.206030 0.649402 0.962543                                                              | H                                                                                               | 0.517621 -0.457863 1.449772                                                               | H                          | 0.492805 -0.835821 1.187389   |              |
|                       | C                                                                                             | -2.210282 -0.721678 -0.380731                                                            | C                                                                                               | 0.214902 0.374997 -0.540341                                                               | C                          | 0.208495 0.088071 -0.764115   |              |
|                       | O                                                                                             | -3.291404 0.016290 -0.340490                                                             | O                                                                                               | 0.005309 1.691798 -0.006801                                                               | O                          | 0.375154 1.947808 -0.627717   |              |
|                       | H                                                                                             | -2.013074 -1.250942 -1.327098                                                            | H                                                                                               | 0.844083 0.543410 -1.413946                                                               | H                          | 0.697661 0.114388 -1.729103   |              |
| H                     | -5.318001 -1.981498 0.374364                                                                  | H                                                                                        | 1.794681 2.482005 0.342544                                                                      | H                                                                                         | 1.213954 2.081460 0.212969 |                               |              |
| O                     | -4.727285 -1.427962 0.898508                                                                  | O                                                                                        | 2.729233 2.303138 0.526416                                                                      | O                                                                                         | 1.982766 1.793801 1.100444 |                               |              |
| H                     | -4.269670 -0.639626 0.246752                                                                  | H                                                                                        | 3.209190 3.110188 0.321138                                                                      | H                                                                                         | 2.908475 1.977730 0.903117 |                               |              |

Table S5 Continued.

|                       |                                                                                                                               |                                                                                                                           |                                                                                                                                 |
|-----------------------|-------------------------------------------------------------------------------------------------------------------------------|---------------------------------------------------------------------------------------------------------------------------|---------------------------------------------------------------------------------------------------------------------------------|
|                       | 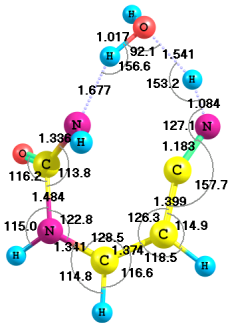 <p style="text-align: center;">TS 31/32</p> |  <p style="text-align: center;">32</p> |  <p style="text-align: center;">TS 32/33</p> |
| Symmetry              | C <sub>1</sub>                                                                                                                | C <sub>1</sub>                                                                                                            | C <sub>1</sub>                                                                                                                  |
| ΔH (0 K)              | 171 [TS 26/3 + E]                                                                                                             | -69 [3+E]                                                                                                                 | -6 [TS 3/4 + E]                                                                                                                 |
| ΔG (298 K)            | 226 [TS 26/3 + E]                                                                                                             | -15 [3+E]                                                                                                                 | 53 [TS 3/4 + E]                                                                                                                 |
| Cartesian coordinates | See Table S4                                                                                                                  | See Table S4                                                                                                              | See Table S4                                                                                                                    |







Table S7 Continued.

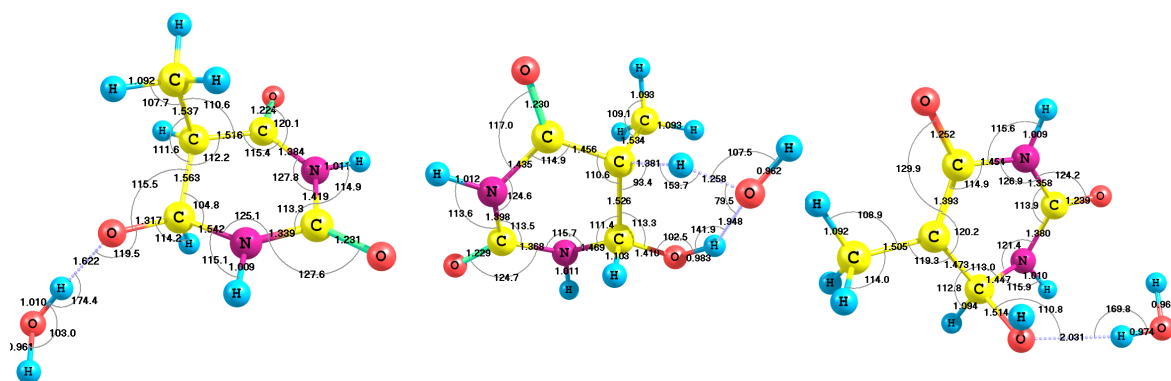

|             | 39                              | TS 39/40                        | 40                              |
|-------------|---------------------------------|---------------------------------|---------------------------------|
| Symmetry    | C <sub>1</sub>                  | C <sub>1</sub>                  | C <sub>1</sub>                  |
| ΔH (0 K)    | -238                            | -130                            |                                 |
| ΔG (298 K)  | -138                            | -21                             |                                 |
|             | C -1.186619 1.483967 0.075856   | C -1.266289 1.607762 0.036581   | C -0.920892 1.125387 0.406878   |
|             | N -1.878683 0.376724 -0.479605  | N -1.892718 0.542860 -0.617359  | N 0.220050 1.536834 -0.204320   |
|             | C -1.463542 -0.942899 -0.533541 | C -1.575882 -0.841794 -0.410245 | C 1.483645 0.820951 -0.266071   |
|             | N 0.087671 1.212267 0.383251    | N -0.014507 1.303410 0.497095   | N -0.807146 -0.094882 1.042141  |
|             | O -1.786879 2.547628 0.231408   | O -1.814952 2.699519 0.169199   | O -1.977608 1.772392 0.417768   |
|             | O -2.195198 -1.797440 -1.016005 | O -2.498008 -1.648186 -0.521696 | O 2.449870 1.481558 -0.710018   |
|             | H 0.651297 1.965313 0.748812    | H 0.554994 2.104613 0.733109    | H -1.702644 -0.449061 1.348190  |
|             | H -2.824213 0.571767 -0.778413  | H -2.863267 0.719673 -0.841478  | H 0.220786 2.459729 -0.611324   |
|             | C -0.221610 -1.630964 1.536956  | C -0.085821 -1.864295 1.287862  | C 2.672932 -1.347767 0.200193   |
| Cartesian   | H -0.706860 -0.849975 2.128965  | H -0.319955 -1.238090 2.160954  | H 2.660851 -2.189437 -0.509937  |
| coordinates | H -0.795141 -2.556401 1.639150  | H -0.786445 -2.702886 1.276516  | H 3.532706 -0.722993 -0.052289  |
|             | H 0.787222 -1.769580 1.929975   | H 0.921217 -2.263836 1.429850   | H 2.854097 -1.785631 1.195283   |
|             | C 0.879698 -0.012312 -0.118162  | C 0.645369 0.165913 -0.156513   | C 0.148092 -1.087801 0.600098   |
|             | C -0.096737 -1.219521 0.061371  | C -0.192181 -1.104322 -0.040555 | C 1.428922 -0.501769 0.167466   |
|             | H 0.320601 -2.057749 -0.502583  | H 0.638806 -1.825725 -0.874660  | H -3.149036 0.012346 -0.560687  |
|             | O 2.030227 -0.115634 0.514430   | O 1.940493 0.031344 0.383799    | O -0.514863 -1.919114 -0.478035 |
|             | H 0.975527 0.155790 -1.219300   | H 0.738727 0.406851 -1.228821   | H 0.267904 -1.819565 1.404642   |
|             | O 4.288476 0.156424 -0.804288   | O 1.758794 -2.143038 -1.352163  | O -3.315185 -0.910609 -0.800978 |
|             | H 4.552670 1.024590 -0.489284   | H 1.860462 -3.093878 -1.245277  | H -2.436329 -1.327955 -0.764374 |
|             | H 3.415834 -0.004141 -0.322079  | H 2.289655 -0.752903 -0.094807  | H -0.049171 -1.659842 -1.283709 |

Table S7 Continued.

|                       | TS 40/41                                                                                                                                                                                                                                                                                                                                                                                                                                                                                                                                                                                                                                                                                    | 41              | 42              |
|-----------------------|---------------------------------------------------------------------------------------------------------------------------------------------------------------------------------------------------------------------------------------------------------------------------------------------------------------------------------------------------------------------------------------------------------------------------------------------------------------------------------------------------------------------------------------------------------------------------------------------------------------------------------------------------------------------------------------------|-----------------|-----------------|
| Symmetry              | C <sub>1</sub>                                                                                                                                                                                                                                                                                                                                                                                                                                                                                                                                                                                                                                                                              | C <sub>1</sub>  | C <sub>1</sub>  |
| ΔH (0 K)              | -169                                                                                                                                                                                                                                                                                                                                                                                                                                                                                                                                                                                                                                                                                        | [39+L]          | -79 [40+M]      |
| ΔG (298 K)            | -66                                                                                                                                                                                                                                                                                                                                                                                                                                                                                                                                                                                                                                                                                         | [39+L]          | -22 [40+M]      |
| Cartesian coordinates | C 0.431033 1.574097 -0.180787<br>N -0.874302 1.522240 0.239762<br>C -1.757336 0.398918 0.185333<br>N 0.888442 0.389368 -0.710714<br>O 1.122246 2.590269 -0.109933<br>O -2.933836 0.588622 0.538311<br>H 1.896929 0.332926 -0.815666<br>H -1.275510 2.384521 0.577466<br>C -2.005929 -2.045102 -0.377452<br>H -2.080534 -2.574690 0.582508<br>H -3.026750 -1.803706 -0.687520<br>H -1.579335 -2.750895 -1.098531<br>C 0.205173 -0.829587 -0.580455<br>C -1.171238 -0.796679 -0.291136<br>H 2.740281 -1.191357 0.481241<br>O 1.214336 -1.714576 0.778901<br>H 0.574296 -1.595218 -1.251092<br>O 3.580931 -0.769742 0.120355<br>H 3.808996 -0.092382 0.763325<br>H 0.763011 -1.456909 1.590847 | See Table S1-7. | See Table S1-7. |

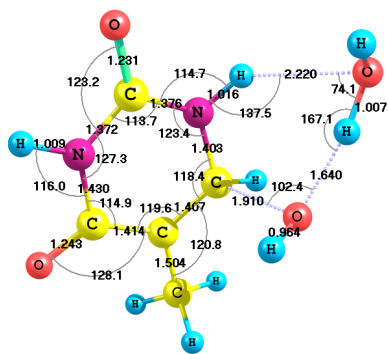

TS 40/41

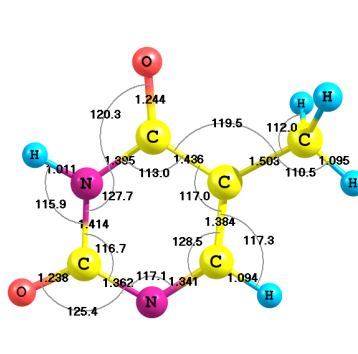

41

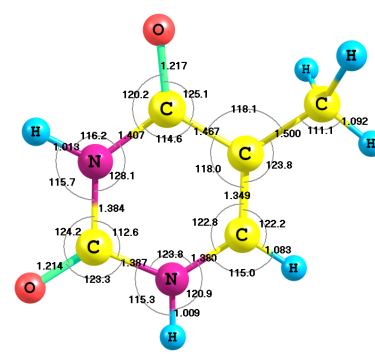

42

**Table S7a.** Energies and selected geometries of transition states, intermediates and product for reaction in Fig.S7a (Planar elimination).

Level of theory used CCSD(T)/6-311++G(d,p)//B3LYP/6-311++G(d,p). Relative energies in kJ mol<sup>-1</sup> with respect to [2\***J+K1**] (see **Table S1-7**) (0 kJ mol<sup>-1</sup>).

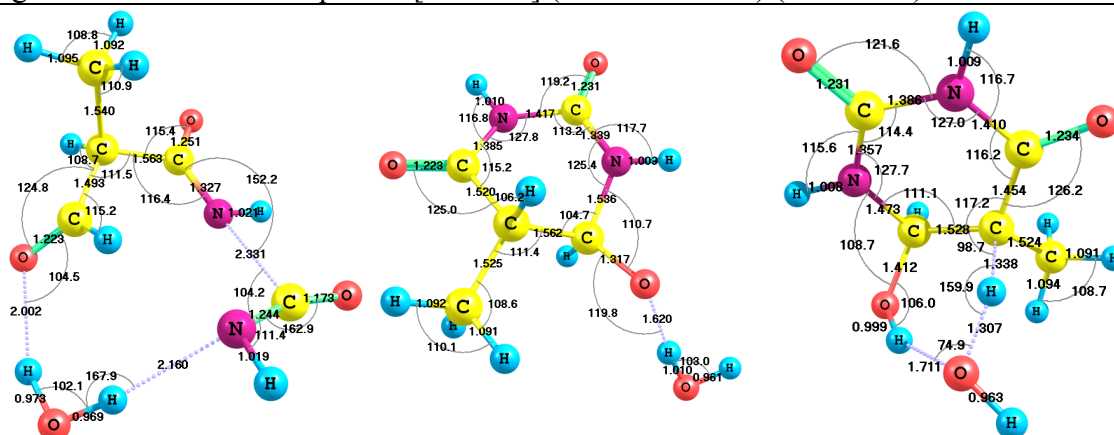

| Symmetry    | C <sub>1</sub> |           |           | C <sub>1</sub> |           |           | C <sub>1</sub> |           |           |           |           |           |
|-------------|----------------|-----------|-----------|----------------|-----------|-----------|----------------|-----------|-----------|-----------|-----------|-----------|
| ΔH (0 K)    | -102           |           |           | -240           |           |           | -170           |           |           |           |           |           |
| ΔG (298 K)  | -8             |           |           | -140           |           |           | -62            |           |           |           |           |           |
|             | C              | N         | O         | C              | N         | O         | C              | N         | O         |           |           |           |
|             | -0.217413      | -0.565721 | 0.029962  | -1.182879      | 1.474893  | 0.138490  | -1.392311      | 1.511511  | -0.687561 |           |           |           |
|             | 1.719433       | 0.647412  | -0.431049 | -1.886075      | 0.409314  | -0.476762 | -2.103209      | 0.330234  | -0.546812 |           |           |           |
|             | 2.467752       | 1.740768  | -0.350623 | -1.478409      | -0.906658 | -0.617027 | -1.611166      | -0.906004 | -0.080194 |           |           |           |
|             | -1.141912      | 0.214913  | -0.257177 | 0.097060       | 1.181325  | 0.400656  | -0.133664      | 1.472618  | -0.182726 |           |           |           |
|             | 0.384863       | -1.512685 | 0.371978  | -1.775555      | 2.527178  | 0.377043  | -1.894961      | 2.508900  | -1.205587 |           |           |           |
|             | 3.675317       | 1.829909  | -0.037136 | -2.223948      | -1.722127 | -1.142262 | -2.415210      | -1.836251 | 0.022233  |           |           |           |
|             | -2.048154      | -0.169581 | 0.005641  | 0.671201       | 1.906266  | 0.804713  | 0.423793       | 2.298408  | -0.336675 |           |           |           |
|             | 2.309976       | -0.147952 | -0.184551 | -2.835344      | 0.623750  | -0.748802 | -3.055580      | 0.341896  | -0.879763 |           |           |           |
|             | 1.566439       | 3.911996  | 0.593284  | 0.874901       | -0.008310 | -0.182580 | 0.241203       | -2.104568 | 1.094124  |           |           |           |
| Cartesian   | H              | 0.858757  | 3.418185  | 1.266985       | C         | -0.101409 | -1.220435      | -0.056052 | H         | 1.322315  | -2.260142 | 1.041406  |
| coordinates | H              | 2.527056  | 3.993397  | 1.106543       | O         | 2.030425  | -0.155825      | 0.431910  | H         | -0.015700 | -1.895871 | 2.144182  |
|             | H              | 1.193370  | 4.919417  | 0.378865       | H         | 0.963474  | 0.221175       | -1.275876 | H         | -0.259258 | -3.033179 | 0.813874  |
|             | C              | 0.457227  | 2.866732  | -1.385978      | O         | 4.284529  | 0.248623       | -0.856157 | C         | 0.546173  | 0.333404  | 0.458060  |
|             | C              | 1.762053  | 3.092068  | -0.695841      | H         | 4.562369  | 1.069587       | -0.442015 | C         | -0.178625 | -0.977896 | 0.157844  |
|             | H              | 2.429316  | 3.630783  | -1.374233      | H         | 3.411714  | 0.043049       | -0.390755 | H         | 0.389470  | -1.258061 | -1.020195 |
|             | O              | 0.199368  | 3.227276  | -2.526187      | C         | 0.497849  | -2.483405      | -0.666152 | O         | 1.268536  | -1.269325 | -1.987028 |
|             | H              | -0.300566 | 2.327893  | -0.794394      | H         | -0.162027 | -3.343136      | -0.532785 | H         | 1.616799  | -2.163383 | -2.068093 |
|             | O              | -2.142341 | 1.531631  | -2.895464      | H         | 0.665032  | -2.352856      | -1.740336 | H         | 0.591119  | 0.529601  | 1.541477  |
|             | H              | -1.791673 | 1.013892  | -2.155646      | H         | 1.461868  | -2.674852      | -0.192848 | O         | 1.894677  | 0.317305  | 0.038822  |
|             | H              | -1.457820 | 2.212957  | -3.010800      | H         | -0.235469 | -1.363358      | 1.026023  | H         | 1.912580  | -0.208009 | -0.810265 |

**Table S8.** Energies and selected geometries of transition states, intermediates and product for reaction in Fig.S8 (Anti elimination).

Level of theory used CCSD(T)/6-311++G(d,p)//B3LYP/6-311++G(d,p). Relative energies in kJ mol<sup>-1</sup> with respect to [2\*J+K2] (see Table S1-7) (0 kJ mol<sup>-1</sup>).

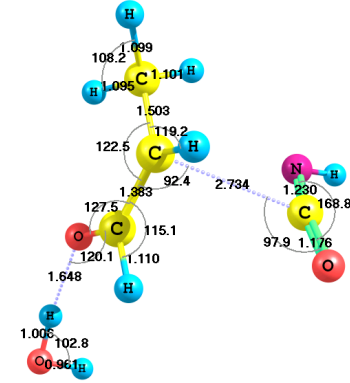



| Symmetry    | C <sub>1</sub> |           |           | C <sub>1</sub> |   |           | C <sub>1</sub> |           |          |           |           |           |
|-------------|----------------|-----------|-----------|----------------|---|-----------|----------------|-----------|----------|-----------|-----------|-----------|
| ΔH (0 K)    | 4              |           |           | -116           |   |           | -102           |           |          |           |           |           |
| ΔG (298 K)  | 45             |           |           | -66            |   |           | -19            |           |          |           |           |           |
|             | N              | 3.107614  | 0.718391  | -1.635819      | N | -0.461769 | -1.455420      | 0.269998  | C        | 0.034028  | -0.102379 | 1.632247  |
|             | C              | 2.273286  | 0.641282  | -0.735328      | C | 0.698900  | -1.019631      | -0.189332 | N        | 1.647065  | 0.347009  | -0.478195 |
|             | O              | 1.555199  | 0.354390  | 0.151106       | O | 1.739387  | -1.656618      | -0.470501 | C        | 2.285596  | 1.379205  | -0.993712 |
|             | H              | 3.556922  | -0.154808 | -1.900204      | H | -0.391559 | -2.469850      | 0.376537  | N        | -0.222939 | 1.080172  | 1.822228  |
|             | C              | 2.767863  | 3.976810  | -1.647740      | C | -0.476280 | 1.206607       | 0.102092  | O        | 0.237330  | -1.246669 | 1.537656  |
|             | H              | 2.336205  | 4.446934  | -2.536922      | C | 0.764880  | 0.538287       | -0.411064 | O        | 3.369619  | 1.456787  | -1.610437 |
|             | H              | 3.288871  | 4.752220  | -1.068026      | O | -1.262333 | 1.857199       | -0.563512 | H        | -0.948762 | 1.297813  | 2.492659  |
|             | H              | 3.530633  | 3.263617  | -1.995814      | H | -0.655235 | 1.069623       | 1.186093  | H        | 2.204795  | -0.490151 | -0.663420 |
|             | C              | 0.423717  | 3.066601  | -1.367490      | O | -3.187176 | -0.698223      | 0.490508  | C        | 0.286498  | 2.668933  | -1.663024 |
| Cartesian   | C              | 1.683555  | 3.308043  | -0.850636      | H | -2.233908 | -0.973673      | 0.428605  | C        | 1.480831  | 2.744748  | -0.781835 |
| coordinates | H              | 1.828605  | 3.152845  | 0.214484       | H | -3.184157 | 0.165164       | 0.065208  | O        | 0.031374  | 3.431638  | -2.589372 |
|             | O              | 0.011691  | 3.298001  | -2.555915      | C | 1.097865  | 0.878667       | -1.863767 | H        | -0.379509 | 1.814596  | -1.448217 |
|             | H              | -0.297045 | 2.611509  | -0.657042      | H | 0.281340  | 0.575488       | -2.524043 | O        | -2.099765 | 2.925496  | -4.346070 |
|             | O              | -2.403682 | 2.506946  | -3.304495      | H | 1.253900  | 1.953559       | -2.001273 | H        | -1.756586 | 2.132848  | -4.767770 |
|             | H              | -2.186829 | 1.608652  | -3.567253      | H | 2.000264  | 0.339227       | -2.156071 | H        | -1.393446 | 3.172199  | -3.711766 |
|             | H              | -1.516313 | 2.869778  | -2.998751      | H | 1.585577  | 0.867622       | 0.243966  | H        | 1.100438  | 2.660733  | 0.242489  |
|             |                |           |           |                |   |           |                | C         | 2.327957 | 3.993044  | -0.987413 |           |
|             |                |           |           |                |   |           |                | H         | 2.760740 | 4.000224  | -1.988056 |           |
|             |                |           |           |                |   |           |                | H         | 1.729625 | 4.901592  | -0.860407 |           |
|             |                |           |           |                |   |           |                | H         | 3.153348 | 4.008344  | -0.271563 |           |

Table S8 Continued.

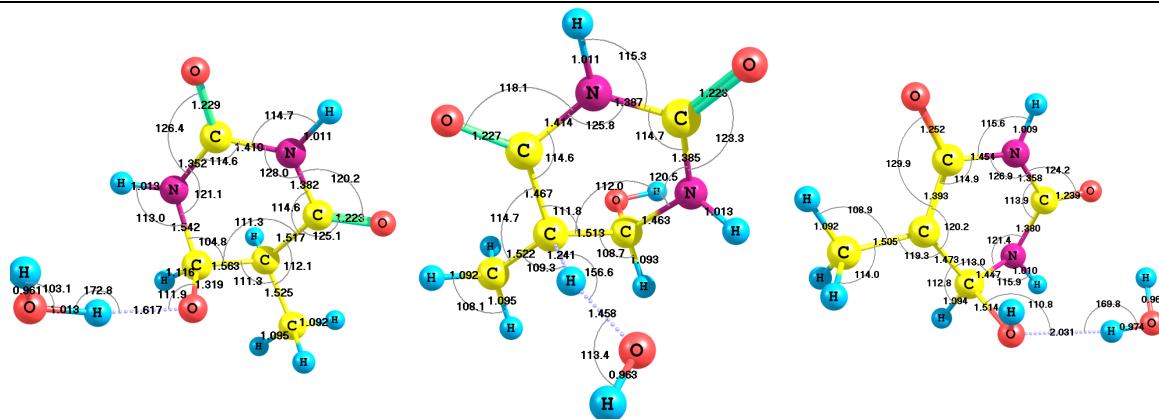

|             |                |                |                |             |           |           |
|-------------|----------------|----------------|----------------|-------------|-----------|-----------|
| Symmetry    | C <sub>1</sub> | C <sub>1</sub> | C <sub>1</sub> |             |           |           |
| ΔH (0 K)    | -235           | -124           | -196           |             |           |           |
| ΔG (298 K)  | -131           | -15            | -92            |             |           |           |
|             | C -1.112730    | 1.456972       | 0.088724       | C -1.231437 | 1.598570  | 0.028979  |
|             | N -1.927536    | 0.341792       | -0.196717      | N -1.958990 | 0.579600  | -0.567178 |
|             | C -1.534121    | -0.962526      | -0.429564      | C -1.583622 | -0.782960 | -0.620998 |
|             | N 0.201795     | 1.171488       | 0.228241       | N 0.131927  | 1.369496  | 0.104190  |
|             | O -1.637901    | 2.560834       | 0.219852       | O -1.762622 | 2.628048  | 0.421838  |
|             | O -2.348866    | -1.792987      | -0.805320      | O -2.427271 | -1.600445 | -0.975809 |
|             | H 0.777849     | 2.003433       | 0.184006       | H 0.498068  | 1.655085  | 1.004773  |
|             | H -2.896560    | 0.562946       | -0.378995      | H -2.946046 | 0.763691  | -0.682606 |
|             | C 0.834104     | -0.039491      | -0.487375      | C 0.338430  | -2.409062 | -0.585295 |
| Cartesian   | C -0.079367    | -1.249419      | -0.108338      | H 1.270871  | -2.610290 | -0.047936 |
| coordinates | O 2.372533     | 2.330271       | -2.239036      | H -0.371266 | -3.202407 | -0.340760 |
|             | H 1.683245     | 2.897042       | -2.596039      | H 0.541315  | -2.458392 | -1.661001 |
|             | H 1.895974     | 1.446566       | -2.103299      | C 0.703641  | 0.116813  | -0.389791 |
|             | C 0.409891     | -2.538354      | -0.760582      | C -0.219220 | -1.059180 | -0.156819 |
|             | H -0.252891    | -3.376048      | -0.533503      | H -0.209931 | -0.987224 | 1.081912  |
|             | H 0.457701     | -2.401121      | -1.841852      | O 0.228491  | -0.521279 | 2.391763  |
|             | H 1.418078     | -2.773723      | -0.404887      | H -0.095358 | -1.063380 | 3.118365  |
|             | H -0.044503    | -1.346526      | 0.987898       | H 1.622613  | -0.041837 | 0.179363  |
|             | H 1.780489     | -0.173452      | 0.089273       | O 1.022145  | 0.258486  | -1.791156 |
|             | O 0.996327     | 0.141384       | -1.783471      | H 1.377120  | 1.148456  | -1.895867 |

See Table S7 38.
